## **A Genetic Program Mediates Cold-warming Response and Promotes Stress-induced Phenoptosis in *C. elegans***

Wei Jiang<sup>1, 2†</sup>, Yuehua Wei<sup>1†</sup>, Yong Long<sup>1, 3†</sup>, Arthur Owen<sup>4</sup>, Bingying Wang<sup>1</sup>, Xuebing Wu<sup>5</sup>, Shuo Luo<sup>5</sup>, Yongjun Dang<sup>2</sup>, Dengke K. Ma<sup>1\*</sup>

<sup>1</sup>Cardiovascular Research Institute and Department of Physiology, University of California San Francisco, San Francisco, CA 94158

<sup>2</sup>Key Laboratory of Molecular Medicine, Ministry of Education and Department of Biochemistry and Molecular Biology, School of Basic Medical Sciences, Shanghai Medical College, Fudan University, Shanghai, 200032, China

<sup>3</sup>State Key Laboratory of Freshwater Ecology and Biotechnology, Institute of Hydrobiology, Chinese Academy of Sciences, Wuhan 430072, China

<sup>4</sup>Department of Molecular Cell Biology, University of California Berkeley, Berkeley, CA 94720

<sup>5</sup>Department of Biology, Massachusetts Institute of Technology, 9 Cambridge Center, Cambridge, MA 02142

†These authors contributed equally to this work

\*For Correspondence: [Dengke.Ma@ucsf.edu](mailto:Dengke.Ma@ucsf.edu)

## 1 **Abstract**

2 **How multicellular organisms respond to and are impacted by severe hypothermic**  
3 **stress is largely unknown. From *C. elegans* screens for mutants abnormally**  
4 **responding to cold-warming stimuli, we identify a molecular genetic pathway**  
5 **comprising ISY-1, a conserved uncharacterized protein, and ZIP-10, a bZIP-type**  
6 **transcription factor. ISY-1 gatekeeps the ZIP-10 transcriptional program by**  
7 **regulating the microRNA *mir-60*. Downstream of ISY-1 and *mir-60*, *zip-10* levels**  
8 **rapidly and specifically increase upon transient cold-warming response.**  
9 **Prolonged *zip-10* up-regulation induces several protease-encoding genes and**  
10 **promotes stress-induced organismic death, or phenoptosis, of *C. elegans*. *zip-10***  
11 **deficiency confers enhanced resistance to prolonged cold-warming stress, more**  
12 **prominently in adults than larvae. We conclude that the ZIP-10 genetic program**  
13 **mediates cold-warming response and may have evolved to promote wild-**  
14 **population kin selection under resource-limiting and thermal stress conditions.**

15

## 16 **Introduction**

17 Temperature shifts pervasively affect numerous biological processes in all  
18 organisms. Heat shock stimuli activate expression of many heat-shock inducible genes  
19 through the sigma-32 factor and the evolutionarily conserved transcription factor HSF  
20 (Heat Shock Factor) in bacteria and eukaryotes, respectively (Gomez-Pastor et al.,  
21 2017; Yura et al., 1993). Coordinated expression of heat shock-induced chaperone  
22 proteins facilitates cellular proteostasis and adaptation to temperature upshift (Mahat et

23 al., 2016; Solís et al., 2016). In contrast to heat shock response, how organisms  
24 respond to cold shock is still largely unknown (Al-Fageeh and Smales, 2006; Choi et al.,  
25 2012; Yenari and Han, 2012; Zhu, 2016). Although extensive RNA expression profiling  
26 studies have identified many protein-coding genes and non-coding RNAs that are  
27 regulated by cold shock via both transcriptional and post-transcriptional mechanisms  
28 (Al-Fageeh and Smales, 2006; Giuliadori et al., 2010; Kandror et al., 2004; Zhou et al.,  
29 2017), master regulators of cold shock response and cold-regulated genes  
30 (counterparts of HSF) have long been elusive and mechanisms of cold shock response  
31 in multicellular organisms remain poorly characterized.

32         At the organismic level, warm-blooded mammals normally keep body  
33 temperature at about 37°C and initiate multiple homeostatic mechanisms to maintain  
34 body temperature upon exposure to hypothermia (Bautista, 2015; Morrison, 2016;  
35 Tansey and Johnson, 2015; Vriens et al., 2014). In humans, therapeutic hypothermia  
36 (32-34°C) has been widely used to treat ischemic disorders and proposed to activate  
37 multifaceted cellular programs to protect against ischemic damages (Choi et al., 2012;  
38 Polderman, 2009; Yenari and Han, 2012). By contrast, cold-blooded animals including  
39 most invertebrates experience varying body temperature depending on the  
40 environment, but can nonetheless elicit stereotypic behavioral, physiological and  
41 transcriptional response to chronic hypothermia or transient cold shock (Al-Fageeh and  
42 Smales, 2006; Garrity et al., 2010). Like many other types of stress, prolonged severe  
43 hypothermia can lead to the death of organisms, in most cases likely because of failure  
44 in adapting to the stress, or alternatively through stress-induced phenoptosis, namely  
45 genetically programmed organismic death (Longo et al., 2005; Skulachev, 1999, 2002).

46 Although phenoptosis has been phenotypically documented in many cases, its  
47 evolutionary significance and genetic mechanisms remain unclear and debated (Longo  
48 et al., 2005; Sapolsky, 2004).

49 We previously discovered a *C. elegans* genetic pathway that maintains cell  
50 membrane fluidity by regulating lipid desaturation in response to moderate hypothermia  
51 (10-15°C) (Fan and Evans, 2015; Ma et al., 2015). Expression of the gene *fat-7*, which  
52 encodes a lipid desaturase, is transcriptionally induced by 10-15°C but not by more  
53 severe hypothermia (i.e. cold shock at 0-4°C), which impairs *C. elegans* reproduction  
54 and growth, and elicits distinct physiological and behavioral responses (Garrity et al.,  
55 2010; Lyons et al., 1975; Ma et al., 2015; Murray et al., 2007). However, as severe  
56 hypothermia arrests most of cell biological processes, strong transcriptional responses  
57 to cold shock e.g. 0-4°C likely only manifest during the organismic recovery to normal  
58 ambient temperature. We thus hypothesize that a genetic pathway differing from that  
59 operating under moderate hypothermia exposure controls the transcriptional response  
60 to severe hypothermia/cold shock followed by warming in *C. elegans*.

61 In this work, we performed transcriptome profiling to first identify genes that are  
62 regulated by exposure to cold shock followed by recovery at normal temperature. We  
63 then used GFP-based transcriptional reporters in large-scale forward genetic screens to  
64 identify a genetic pathway consisting of *isy-1* and *zip-10*, the latter of which responds to  
65 cold-warming (CW) and mediates transcriptional responses to CW. Unexpectedly, we  
66 found strong *zip-10* induction promotes organismal death while deficiency of *zip-10*  
67 confers resistance to prolonged CW stress, more prominently in adults than young  
68 larvae. We propose that CW activates a ZIP-10 dependent genetic program favoring *C.*



69 *C. elegans* phenoptosis and postulate that such programmed organismic death may have  
70 evolved to promote wild-population kin selection under thermal stress conditions.

71

## 72 **Results**

73 To identify new mechanisms of *C. elegans* response to severe hypothermia, we  
74 performed RNA sequencing (RNA-seq) of wild-type *C. elegans* populations after 2-hr  
75 exposure to 4°C cold shock followed by recovery at 20°C for 1 hr. We used such CW  
76 conditions in an attempt to identify genes that specifically and rapidly respond to CW  
77 rather than those that respond to general organismic deterioration after long cold  
78 exposure. After differential expression analyses of triplicate samples, we identified 604  
79 genes that are significantly up- or down-regulated by such CW conditions (Figure 1-  
80 source data 1, Figure 1A and Figure 1-figure supplement 1A). Gene ontology analysis  
81 indicated that the CW-regulated genes are involved in biological processes including  
82 lipid metabolisms, autophagy, proteostasis and cell signaling (Figure 1-figure  
83 supplement 1B). We generated transgenic *C. elegans* strains in which *GFP* is driven by  
84 promoters of the top-ranked CW-inducible genes. In this work, we focus on *asp-17* as a  
85 robust CW-inducible reporter gene owing to its low baseline expression level and high-  
86 fold induction by CW, features that permitted facile isolation of full-penetrance mutants  
87 after random mutagenesis (see below) with both abnormal *asp-17p::GFP* expression  
88 and altered organismic tolerance to prolonged cold stress.

89 *C. elegans asp-17* encodes an aspartyl-like protease with unknown molecular  
90 functions. Like other CW-inducible genes, *asp-17* up-regulation is more prominently

91 induced by severe than moderate hypothermia followed by recovery from cold shock  
92 (Figures 1B and 1C). Among the aspartyl-like protease family members, we found that  
93 only *asp-17* was robustly and specifically induced by CW (Figure 1D). The up-regulation  
94 of endogenous *asp-17* by CW can be recapitulated by an integrated GFP reporter  
95 driven by the endogenous *asp-17* promoter, indicating transcriptional regulation of *asp-*  
96 *17* by CW (Figure 2-Figure supplement 1A). We varied CW treatment conditions and  
97 found that the induction of *asp-17* strictly required the warming phase after cold shock  
98 (Figure 1E). However, heat shock at 32°C did not increase *asp-17* expression (Figure  
99 1E), consistent with previous large-scale transcriptome profiling studies in *C. elegans*  
100 (Brunquell et al., 2016). Single-molecule fluorescent in-situ hybridization (smFISH)  
101 identified the CW-induced *asp-17* predominantly in intestinal cells (Figure 1F). Since  
102 CW activates numerous other genes in addition to *asp-17*, we sought to use *asp-*  
103 *17p::GFP* as a robust readout reporter to identify the upstream genetic pathway and  
104 transcriptional regulators that control *asp-17* induction by CW.

105 We performed a forward genetic screen using EMS-induced random  
106 mutagenesis of a parental strain carrying a genome-integrated *asp-17p::GFP* reporter  
107 and isolated over 30 mutants with constitutive *asp-17p::GFP* expression in the absence  
108 of CW (Figure 2-figure supplement 1B and 1C). We molecularly cloned one mutant  
109 *dma50* that exhibited fully penetrant and constitutively strong expression of *asp-*  
110 *17p::GFP* (Figure 2A,B and Figure 2-figure supplement 1D-1F). Compared with wild  
111 type, *dma50* strongly up-regulated *asp-17::GFP* in the intestine (Figure 2B). By single  
112 nucleotide polymorphism-based linkage analysis of the intestinal *asp-17p::GFP*  
113 phenotype, we mapped *dma50* to a genetic interval on Chromosome V and used whole-

114 genome sequencing to identify candidate causal gene mutations (Figure 2-figure  
115 supplement 1D,E). Based on phenocopying by feeding RNAi and transformation rescue  
116 of the *asp-17p::GFP* phenotype, *dma50* defines a previously uncharacterized *C.*  
117 *elegans* gene *isy-1* (Figures 2A-2F and Figure 2-figure supplement 1F). *isy-1* (Interactor  
118 of SYF1 in yeast) encodes a protein with strong sequence similarity to an evolutionarily  
119 highly conserved family of RNA-binding proteins in eukaryotes (Figure 2A and Figure 2-  
120 figure supplement 2A-2C) (Dix et al., 1999; Du et al., 2015).

121 *dma50* caused substitution of a negatively charged glutamate, which is  
122 completely conserved in the ISY protein family, to a positively charged lysine in the  
123 predicted coiled-coil region of *C. elegans* ISY-1 (Figure 2A). An *isy-1p::isy-1::GFP*  
124 translational reporter indicated a rather ubiquitous distribution of ISY-1::GFP in many  
125 tissues including intestinal nuclei (Figure 2C). The strong intestinal *asp-17p::GFP*  
126 expression caused by *dma50* was fully rescued by transgenic expression of wild-type  
127 *isy-1(+)*, single-copy integration of a *mCherry*-tagged *isy-1(+)* allele, or *isy-1(+)*  
128 expression driven by the intestine-specific *ges-1* promoter (Figures 2E and 2F). In  
129 addition, the *ges-1*-driven transgenic expression of sense plus antisense *isy-1* RNAi  
130 fully recapitulated the *dma50* phenotype (Figure 2D). Endogenous expression of *asp-17*  
131 was also drastically up-regulated in *isy-1* mutants (Figure 2-Figure supplement 2D).  
132 Thus, these results identify *isy-1* as a causal cell-autonomous regulator of *asp-17*.

133 Human ISY1 is critical for certain microRNA processing while yeast ISY1 is a  
134 likely component of the spliceosome (Dix et al., 1999; Du et al., 2015; Galej et al.,  
135 2016). We found that CW-induced *asp-17* up-regulation was further enhanced in *isy-1*  
136 mutants compared with wild type (Figure 3A), suggesting that ISY-1 normally restricts

137 transcriptional activity of *asp-17*. To determine the mechanism by which ISY-1 regulates  
138 transcription of *asp-17*, we sought to identify transcription factors (TF) that meet two  
139 criteria: a), its mRNA or protein products are altered in *isy-1* mutants, and b), it is  
140 genetically epistatic to *isy-1*, i.e. its loss-of-function (LOF) can suppress *isy-1* LOF (thus  
141 also likely required for *asp-17* induction by CW). We performed RNA-seq from triplicate  
142 samples of wild-type hermaphrodites and *isy-1* mutants, from which we analyzed  
143 differentially expressed TF-encoding genes in *isy-1* mutants and found that a bZIP-type  
144 transcription factor-encoding gene *zip-10* met both criteria (Figure 3B, Figure 3-source  
145 data 1). *zip-10* mRNA was drastically up-regulated in *isy-1* mutants, whereas levels of  
146 closely related bZIP family genes, such as *zip-11*, were unaffected (Figure 3C).  
147 Importantly, genetic deletion of *zip-10* completely abrogated the ability of *isy-1* RNAi to  
148 activate *asp-17p::GFP* (Figure 3D). These results indicate that ISY-1 regulates *asp-17*  
149 by controlling the level of *zip-10* mRNAs.

150         Next, we examined how the ISY-1/ZIP-10/ASP-17 pathway is regulated by CW.  
151 CW did not apparently alter levels of endogenous *isy-1* mRNAs or mCherry-tagged ISY-  
152 1 proteins under the endogenous *isy-1* promoter (Figure 2-Figure supplement 2D and  
153 2E). By contrast, we found that CW induced drastic up-regulation of ZIP-10 proteins  
154 from a tagged *zip-10p::zip-10::EGFP::FLAG* allele in an integrated transgenic strain  
155 (Figure 3E). Although EGFP fluorescence was invisible in animals carrying such  
156 transgenes (likely because it is sandwiched by *zip-10* and FLAG), the striking induction  
157 of ZIP-10::EGFP::FLAG was completely blocked by RNAi against *zip-10* or *GFP*,  
158 confirming the transgene specificity (Figure 3F). The baseline level of ZIP-  
159 10::EGFP::FLAG was close to the detection limit of Western blot under normal

160 conditions, but nonetheless is strongly up-regulated upon RNAi against *isy-1* (Figure  
161 3F). Similar to that of *asp-17*, the induction of *zip-10p::zip-10::EGFP::FLAG* strictly  
162 required the warming phase of CW and occurred rapidly but transiently after warming  
163 during CW (Figure 3G). CW strongly up-regulated *asp-17* expression in both wild type  
164 and *isy-1* mutants, which exhibited abnormally high *zip-10* mRNA levels (Figure 3H).  
165 Furthermore, *zip-10* deletion completely abrogated the up-regulation of *asp-17* levels by  
166 CW (Figure 3I). We also examined the ZIP-10 dependency of other CW-inducible genes  
167 identified by RNA-seq and found that at least *cpr-3* also required ZIP-10, but other CW-  
168 inducible genes including *srr-6* and *F53A9.1*, did not (Figure 3I). These results  
169 demonstrate that ISY-1 suppresses *asp-17* by decreasing *zip-10* levels whereas CW  
170 up-regulates ZIP-10 protein abundance to promote *asp-17* expression.

171         How is *zip-10* regulated by ISY-1 and CW? Loss of ISY-1 function affected  
172 neither general intron splicing based on an intronic GFP reporter assay, nor specific  
173 splicing of *zip-10*, although both CW and *isy-1* mutations strongly up-regulated *zip-10*  
174 mRNA levels (Figure 3-Figure supplement 1A-1E). We constructed a GFP  
175 transcriptional reporter driven by the endogenous *zip-10* promoter and found it was  
176 markedly up-regulated by *isy-1* RNAi (Figure 3-Figure supplement 2A). While non-  
177 thermal stresses such as hypoxia and starvation did not increase ZIP-10 levels, CW  
178 drastically increased abundance of ZIP-10 in both cytosol and nucleus without affecting  
179 abundance of other house-keeping proteins, including HSP90, tubulin and histone H3  
180 (Figure 3-Figure supplement 2B and 2C). CW up-regulation of ZIP-10 required warming  
181 and was enhanced by more prolonged cold shock (Figure 3-Figure supplement 2D).  
182 Since CW can markedly increase *zip-10* mRNA levels but to a lesser extent than the

183 *isy-1* mutation (Figure 3-Figure supplement 1D and 1E), we tested whether ZIP-10  
184 proteins might be regulated by CW through translational control and mRNA stability.  
185 RNAi against genes encoding eIF5 and a component of the Ccr4-Not complex did not  
186 apparently alter ZIP-10 levels (Figure 3-Figure supplement 2E). Together, these results  
187 indicate that CW and ISY-1 regulate *zip-10* primarily at the transcriptional level.

188 Human ISY1 facilitates the processing of primary transcripts encoding certain  
189 families of microRNAs (Du et al., 2015). Both *zip-10* and *asp-17* are up-regulated in a  
190 mutant *C. elegans* strain deficient in the microRNA *mir-60* (Kato et al., 2016). We thus  
191 tested whether *mir-60* mediates the regulation of *zip-10* by ISY-1. Immunoprecipitation  
192 of mCherry-tagged ISY-1 followed by quantitative PCR (QPCR) revealed specific  
193 binding of primary transcripts encoding *mir-60* as well as a protein-coding gene *cebp-1*  
194 (Figure 4A-4C). Although neither *isy-1* nor *mir-60* levels were affected by CW, we found  
195 CW slightly increased *mir-60* binding to ISY-1, perhaps as a feedback mechanism to  
196 limit over-activation of *zip-10*-dependent genes after CW treatment (Figure 4B).  
197 Importantly, mature *mir-60* levels were drastically decreased in *isy-1* mutants while loss  
198 of *mir-60* led to up-regulation of *zip-10* and *zip-10*-dependent subset of CW-inducible  
199 genes, including *asp-17* and *cpr-3*, but not many other CW-inducible genes (Figure 4D,  
200 4E and Figure 4-figure supplement 1). The 3' untranslated region (Utr) of *zip-10*  
201 appeared not to be regulated by CW or *isy-1* RNAi (Figure 4F). However, *isy-1* RNAi  
202 caused an abnormally high baseline level of ZIP-10 in the absence of CW and enabled  
203 further heightened ZIP-10 up-regulation in response to CW, followed by its down-  
204 regulation over an extended period of warming (Figure 4G). These results indicate that  
205 CW regulates transcription of *zip-10* (and thereby that of *asp-17*), while ISY-1 controls

206 expression of *zip-10* via *mir-60*, likely through microRNA processing and regulation of  
207 additional upstream transcriptional *zip-10* regulators that respond to CW.

208 We compared the genes differentially regulated by CW and those by *isy-*  
209 *1(dma50)* mutants and found 246 genes, including the two ZIP-10 dependent targets  
210 *asp-17* and *cpr-3*, that are commonly regulated by both conditions (Figure 5A, Figure 5-  
211 source data 1). Global transcriptome changes between these two conditions are also  
212 significantly correlated (Figure 5B) (correlation coefficient  $R$  as 0.54, significance  $P$   
213 value as 0). We used the bioinformatics tool MEME (Bailey et al., 2009) to identify  
214 motifs present in the promoters (~600 bp upstream of transcription start sites) of the  
215 commonly regulated gene subset and identified a single enriched motif characterized by  
216 AT-rich sequences (Figure 5C). The gene most enriched with this motif is *asp-17*, the  
217 promoter of which contains 16 such motifs (Figure 5C). ZIP-10 is a bZIP-type  
218 transcription factor predicted to contain N-terminal low sequence-complexity domains  
219 and a C-terminal DNA-binding and glutamine-rich transactivation domain (Figure 3-  
220 Figure supplement 2F-2H). To test whether the *asp-17* promoter with the identified AT-  
221 rich motifs can be bound directly by ZIP-10, we performed chromatin  
222 immunoprecipitation (ChIP) experiments and detected *asp-17* promoter sequences in  
223 the FLAG-tagged ZIP-10 chromatin complex only under CW conditions (Figure 5D).  
224 These results indicate that ZIP-10 directly binds to and activates the *asp-17* promoter in  
225 the genetic program regulated by ISY-1 and CW.

226 The striking regulation of *zip-10* and *asp-17* by CW and ISY-1 prompted us to  
227 examine the organismic phenotype of various mutants upon prolonged CW stress. A  
228 majority of wild-type *C. elegans* adults died upon prolonged CW stress (e.g. 2-4°C for



229 over 24 hrs) (Ohta et al., 2014). We found that *asp-17* or *zip-10* loss-of-function mutants  
230 exhibited markedly higher survival rates than wild type under the same prolonged CW  
231 stress condition (Figure 5E). Consistent with a role of wild-type *zip-10* in promoting  
232 organismic death, inducible *zip-10* over-expression by mild transient heat shock,  
233 mediated by the *hsp-16* promoter, promoted animal death even in the absence of CW  
234 (Figure 5F). By contrast, other ectopically induced *zip* genes including *zip-11* and *zip-2*  
235 did not affect animal death, while a mutation specifically disrupting the glutamine-rich  
236 transactivation domain of ZIP-10 abolished the death-promoting effect (Figures 5F and  
237 Figure 3-Figure supplement 2H). Although *zip-10* is genetically epistatic to *isy-1* in the  
238 regulation of *asp-17*, we found that *isy-1* mutants are also markedly resistant to  
239 prolonged cold stress. This paradox was resolved after we observed that many  
240 downstream target genes of the stress-coping transcription factors HIF-1, HSF-1 and  
241 DAF-16 are up-regulated in *isy-1* mutants, and LOF of at least *daf-16* could partly  
242 suppress cold tolerance by *isy-1* RNAi (Figures 5G and 5H). Since ISY-1 regulates *zip-*  
243 *10* via *mir-60* (Figure 4) supporting a role of ISY-1 in specific microRNA processing (Du  
244 et al., 2015), we performed small RNA library sequencing of wild type animals and *isy-1*  
245 mutants and identified specific members of microRNAs that were differentially  
246 regulated, including *mir-60* and additional microRNAs predicted to target stress-coping  
247 TFs (Figure 5-Figure supplement 1A-1F). Thus, *isy-1* mutants likely exhibit pleiotropic  
248 phenotypes caused by abnormal activation of multiple TFs in addition to ZIP-10. In  
249 contrast to ZIP-10 dependent genes (*asp-17* and *cpr-3*), the HIF-1/HSF-1/DAF-16 target  
250 genes were not apparently induced by CW (Figure 1-source data 1). Furthermore,  
251 unlike HSF-1 or DAF-16 that are induced by other types of stress stimuli, ZIP-10 is more



252 strongly induced by CW in adults than in larvae (Figure 5-figure supplement 2C),  
253 suggesting phenoptosis-promoting effects of *zip-10* for adults more specifically. Indeed,  
254 the phenotypic difference in cold tolerance between wild type animals and *zip-10*  
255 mutants manifested more prominently in developmentally more mature-stage and older  
256 animals (Figure 5-figure supplement 2D). These results indicate that CW specifically  
257 activates a ZIP-10-driven and developmental stage-modulated transcriptional genetic  
258 program to promote the organismic death, or phenoptosis, of *C. elegans* (Figure 5I).

259

## 260 Discussion

261 From a genetic screen for *C. elegans* mutants with altered transcriptional  
262 response to CW, we identified *isy-1* and subsequently discovered the CW and ISY-1-  
263 regulated transcription factor ZIP-10 as a key mediator of the transcriptional response to  
264 CW. A thermal stress-responding TF might be expected to promote adaptation of  
265 animals towards the stressor, causing its LOF mutants to be sensitive to the stress.  
266 Unexpectedly, we found *zip-10* mutants are markedly resistant to prolonged cold stress.  
267 However, unlike other stress-responding TFs that activate genes largely beneficial for  
268 physiological homeostasis and thus animal health under stress conditions (Baird et al.,  
269 2014; Dempersmier et al., 2015; Hwang and Lee, 2011; Kandror et al., 2004; Kumsta et  
270 al., 2017; Landis and Murphy, 2010), identified transcriptional targets of ZIP-10 include  
271 at least two Cathepsin-type proteases, CPR-3 and ASP-17 (Figure 4E). In contrast to  
272 aspartyl-type proteases which are largely unknown in cellular functions, caspase-type  
273 proteases are well-known apoptotic cell death executioners while CPR-4, a Cathepsin

274 CPR-3 paralogue, has been shown to inhibit cell deaths in *C. elegans* (Metzstein et al.,  
275 1998; Peng et al., 2017; Peter, 2011). Ectopic expression of *zip-10* and its targets  
276 promotes organismic deaths, in contrast to the effect of *zip-10* or *asp-17* deficiency on  
277 cold tolerance (Figure 5E and 5F). As duration of cold shock affects levels of ZIP-10  
278 and transient CW does not trigger phenoptosis, the pro-death role of the *zip-10* genetic  
279 program likely depends on multiple factors, including the duration and severity of cold  
280 exposure. Notably, apoptotic cell death-promoting effects have also been described for  
281 specific members of mammalian bZIP TFs (Chüeh et al., 2017; Hartman et al., 2004;  
282 Ritchie et al., 2009). The specific and robust induction of ZIP-10 by CW, the opposing  
283 cold-tolerance phenotypes caused by *zip-10* loss-of-function and gain-of-function  
284 genetic manipulations, as well as the pro-death roles of ZIP-10 targets support the  
285 notion that the *zip-10* pathway is activated by severe CW to promote phenoptosis.

286         How do ISY-1 and CW regulate the *zip-10* pathway? We found that the *zip-10*  
287 promoter activity responds to the loss of ISY-1, which normally maintains *mir-60* levels  
288 and thereby regulates *zip-10* transcription likely through the processing of small RNAs.  
289 Severe cold stress also leads to accumulation of another class of small RNA risiRNA,  
290 which is important for maintaining rRNA homeostasis (Zhou et al., 2017). Whether ISY-  
291 1 might also affect risiRNA processing remains to be characterized. Constitutive up-  
292 regulation of ZIP-10 targets in *isy-1* mutants and the lack of evidence for regulation of  
293 ISY-1 by CW supports ISY-1 as a gate-keeper for the ZIP-10-driven transcriptional  
294 response to CW (Figure 5I). Regulation of *zip-10* is primarily transcriptional based on  
295 evidence we present in this study; further studies are required to discern to what extent  
296 *mir-60* might directly act at the *zip-10* locus or more indirectly impact the transcription of

297 *zip-10*, e.g. by post-transcriptionally inhibiting translation of a transcriptional activator.  
298 Up-regulation of the activity of the *zip-10* promoter by CW indicates that additional cold-  
299 responding sensors and effectors upstream of ZIP-10 remain to be identified, by  
300 signaling mechanisms perhaps similar to the well-characterized cold-responding  
301 pathways found in other organisms (Dempersmier et al., 2015; Kandror et al., 2004;  
302 Zhu, 2016). Precisely how *zip-10* is regulated by CW in coordination with ISY-1 to  
303 promote *C. elegans* death under prolonged CW stress awaits further investigation.

304         The roles of ZIP-10 and a dedicated genetic program in promoting organismic  
305 death are surprising but would make sense in light of the evolutionary kin selection  
306 theory. Kin selection refers to the evolutionary process promoting the reproductive  
307 success of an organism's kin despite a cost to the organism's own reproduction  
308 (Hamilton, 1963; Smith, 1964). Dedicated genetic programs may have evolved to  
309 promote kin selection at the population level. Although the concept and potential  
310 mechanisms of programmed organismic death, or phenoptosis, are debated, examples of  
311 kin selection and stress-induced organismic deterioration have been widely documented  
312 in many organisms (Longo et al., 2005; Sapolsky, 2004; Skulachev, 1999, 2002).

313         Laboratory conditions for hermaphroditic *C. elegans* clearly no longer exert  
314 selection pressure for genetic programs underlying phenoptosis or kin selection.  
315 However, our mathematic modeling of an exemplar situation of population growth for  
316 wild-type and *zip-10* deficient animals under food-limiting and CW stress conditions  
317 supports the phenoptosis or kin selection hypothesis for the *zip-10* pathway (Figure 5-  
318 Figure supplement 2A and 2B). Experimentally, we found that both the CW-induced *zip*-  
319 *10* expression and the death-promoting effect of ZIP-10 occurred more prominently in

320 older adults than in larvae (Figure 5-Figure supplement 2C and 2D). Extending from the  
321 kin selection theory, we postulate that the evolutionary advantage of programmed  
322 organismic death might manifest in the wild, where resources for growth and  
323 reproduction are limited and environments can change drastically. As such, the  
324 selective death of adult animals would benefit young and reproductively more privileged  
325 populations to facilitate the spreading of genes by young populations under resource-  
326 limiting and high-stress conditions. Our work provides an unprecedented example of  
327 stress-induced phenoptosis in *C. elegans* and identify a specific transcription factor in a  
328 genetic program that likely evolved to promote kin selection during animal evolution.  
329 These findings therefore bear broad implications for understanding thermal stress  
330 response, programmed organismic death (phenoptosis) and evolutionary biology.

331

## 332 **Materials and Methods**

### 333 *C. elegans* strains and genetic manipulations

334 *C. elegans* strains were maintained with standard procedures unless otherwise  
335 specified. The N2 Bristol strain was used as the reference wild type, and the  
336 polymorphic Hawaiian strain CB4856 was used for genetic linkage mapping and SNP  
337 analysis (Brenner, 1974; Davis et al., 2005). Forward genetic screen for constitutive  
338 *asp-17p::GFP* reporter-activating mutants after ethyl methanesulfonate (EMS)-induced  
339 random mutagenesis was performed as described previously (Ma et al., 2012, 2015).  
340 Single-copy integration of *isy-1p::isy-1::mCherry* transgene was generated using the  
341 MosSCI method (Frøkjær-Jensen et al., 2008). To generate *asp-17* null alleles in *C.*

342 *elegans*, we used CRISPR-Cas9 to induce double stranded breaks and subsequent  
343 non-homologous end joining caused a deletion of *asp-17*. Feeding RNAi was performed  
344 as previously described (Kamath and Ahringer, 2003). Transgenic strains were  
345 generated by germline transformation as described (Mello et al., 1991). Transgenic  
346 constructs were co-injected (at 10 - 50 ng/μl) with dominant *unc-54p::mCherry* or *rol-6*  
347 markers, and stable extrachromosomal lines of mCherry+ or roller animals were  
348 established. Genotypes of strains used are as follows: *daf-16(mu86) I*, *mir-60(n4947) II*;  
349 *isy-1(dma50) V*, *zip-10(ok3462) V*, *asp-17(dma99) V*, *dmals10[asp-17p::GFP; unc-*  
350 *54p::mCherry] X*, *dmals21[zip-10p::GFP; unc-54p::mCherry]*; *wgls634[zip-10p::zip-*  
351 *10::EGFP::FLAG + unc-119(+)]*, *oxTi302 [eft-3p::mCherry::tbb-2 3'UTR + Cbr-unc-*  
352 *119(+)]*, *dmaSi1[isy-1p::isy-1::mCherry, unc-119(+)]*, *dmaEx95[ges-1p::isy-1(+); rol-*  
353 *6(+)]*, *dmaEx99[isy-1 genomic DNA (2ng/ul); rol-6(+)]*, *nEx102[ges-1p::isy-1(+); rol-*  
354 *6(+)]*, *nEx103[ges-1p::isy-1(+); rol-6(+)]*, *dmaEx104[ges-1p::mCherry::3utr(zip-10), rol-*  
355 *6(+)]*, *dmaEx123[hsp-16p::zip-10; rol-6(+)]*, *dmaEx124[hsp-16p::zip-10; rol-6(+)]*,  
356 *dmaEx131[zip-10p::GFP; unc-54p::mCherry]*.

357

### 358 Sample and library preparation for RNA sequencing

359 Control N2 animals and the *isy-1* mutants were maintained at 20°C. For cold stress, N2  
360 animals were exposed to 4°C for 2 hrs followed by 1 hr recovery at 20°C. Upon sample  
361 collection, the animals were washed down from NGM plates using M9 solution and  
362 subjected to RNA extraction using the RNeasy Mini Kit from Qiagen. 1 μg total RNA from  
363 each sample was used for sequencing library construction. Each treatment included 3

364 biological replicates. The NEBNext® rRNA Depletion Kit was used for rRNA depletion.  
365 After rRNA depletion, the Agencourt RNAClean XP Beads from Beckman Coulter were  
366 used for RNA purification. Then, the NEBNext® Ultra™ Directional RNA Library Prep Kit  
367 for Illumina® was used for RNA fragmentation, first strand and second strand cDNA  
368 synthesis and double-stranded cDNA end repair. Double strand cDNAs were purified  
369 using the Agencourt AMPure XP from Beckman Coulter and ligated to adaptors of the  
370 NEBNext Multiplex Oligos for Illumina. Finally, the Q5 Hot Start HiFi PCR Master Mix was  
371 used for PCR enrichment of the adaptor-ligated DNA. The concentration and quality of  
372 the constructed sequencing libraries were measured by using the Agilent High Sensitivity  
373 DNA Kit and a Bioanalyzer 2100 from Agilent Technologies. The libraries were submitted  
374 to 100 bp paired-end high throughput sequencing using Hiseq-3000 by the Center for  
375 Advanced Technology (CAT) of the University of California, San Francisco.

376 RNA-seq data analysis was performed using a super computer system equipped  
377 with multiple processors. The raw reads were trimmed and filtered by the prinseq-lite  
378 software (0.20.4) (Schmieder and Edwards, 2011). Reads longer than 30 bp and with a  
379 minimum quality score higher than 15 were kept and used for subsequent analyses. The  
380 filtered left and right read sets were compared by the Pairfq script to separate paired and  
381 single reads. The clean reads were mapped to the *C. elegans* genome sequence using  
382 Hisat2 (2.0.5)(Kim et al., 2015) with default parameters. The number of mapped reads  
383 were counted by featureCounts from the Subread package (1.5.0) (Liao et al., 2014).  
384 Differential gene expression analysis was performed using the DESeq2 package (Love  
385 et al., 2014). Adjusted P-value  $\leq 0.05$  was used as the threshold to identify the  
386 differentially expressed genes. Gene ontology and KEGG pathway enrichment analyses

387 for the differentially expressed genes were conducted using the Cytoscape plugins  
388 BiNGO (Maere et al., 2005) and ClueGO (Bindea et al., 2009), respectively. Plots for the  
389 mapped reads were generated by IGVtools (Thorvaldsdóttir et al., 2013).

390

### 391 Quantitative RT-PCR

392 50 µl pellet animals were resuspended in 250 µl lysis buffer of Quick-RNA  
393 MiniPrep kit (Zymo Research, R1055) then lysed by TissueRuptor (Motor unit “8” for 1  
394 min). Total RNA was extracted following the instruction (Zymo Research, R1055). 2 µg  
395 RNA/sample was reverse transcribed into cDNA (BioTools, B24408). Real-time PCR  
396 was performed by using Roche LightCycler®96 (Roche, 05815916001) system and  
397 SYBR Green (Thermo Fisher Scientific, FERK1081) as a dsDNA-specific binding dye.  
398 qRT-PCR condition was set to 95°C for denaturation, followed by 45 cycles of 10s at  
399 95°C, 10s at 60°C, and 20s at 72°C. Melting curve analysis was performed after the  
400 final cycle to examine the specificity of primers in each reaction. Relative mRNA was  
401 calculated by  $\Delta\Delta CT$  method and normalized to actin. Primers for qRT-PCR: *asp-17*  
402 (Forward, ATGTTCCGCTGACTGCGAAG; Reverse, TTTCATTCATTTATCCCAC),  
403 *F53A9.1*, Forward, ACTACGGAAACGGAGGATAC; Reverse,  
404 TGGCCGTGATGATGATGATG), *srr-6* (Forward, CTCCAAGTCCTGAAGTCGTG;  
405 Reverse, GTAGGGATGGATTGAACTCG), *isy-1* (Forward,  
406 AGATGCTGAGCGATTCAGAC; Reverse, CTTTCGATAGTCCGTACCAC), *zip-10*  
407 (Forward, TCGAGATGCTCTTCAACTG; Reverse, CTAAGTCTTGCCGGAG), *cpr-3*  
408 (Forward, GTAGTGGAGCAGTAACAGGTG; Reverse,

409 CAGTTTGAATTTCCGGTGACGG), *act-3* (Forward, TCCATCATGAAGTGCGACAT;  
410 Reverse, TAGATCCTCCGATCCAGACG).

411

#### 412 Sample preparation and Western blot of proteins

413 Transgenic (*isy-1p::isy-1::mCherry* and *zip-10p::zip-10::EGFP::FLAG*) animals  
414 were cold shocked (4°C) for 0, 1, 2 or 4 hrs, followed by recovery at 25°C for 1 h. Animals  
415 were harvested and washed 3 times with M9 and 20 µl pellet animals were lysed directly  
416 in Laemmli Sample Buffer and used for Western blot analysis. Proteins were resolved by  
417 15% SDS-PAGE (Bio-Rad, 4561084) and transferred to a nitrocellulose membrane (Bio-  
418 Rad, 1620167). Proteins were detected using antibodies against Flag (Sigma, F3165),  
419 mCherry (M11217, Life Technologies), Tubulin (Sigma, T5168), H3 (Abcam, ab1791) or  
420 HSP90 (Proteintech, 13171-1-AP).

421 For subcellular fractionation, 50 µl pellet animals were resuspended in 150 µl 1 X  
422 cell lysis buffer (Cell Signaling Technology, 9803S) with protease inhibitor cocktail  
423 (BioTools, B14002) and 10 µM PMSF, and incubated for 10 min on ice. Animals were  
424 lysed by TissueRuptor (Qiagen, 9001271) with Motor unit “6” for 30 sec on ice. After  
425 incubation on ice for 5 minutes and centrifugation at 5,000 rpm at 4°C for 2 min, the  
426 supernatant was collected as the cytoplasmic part. The nuclear pellet was washed three  
427 times with lysis buffer and resuspended in 150 µl RIPA buffer (Thermo Fisher Scientific,  
428 P89900) for 30 min on ice, spun at 12,000 rpm for 15 min, and the supernatant was  
429 collected as nuclear extract. Tubulin and H3 were separately used as cytoplasm and  
430 nuclear loading control. For RNAi experiments, *zip-10p::zip-10::EGFP::FLAG* animals



431 were bleached and the eggs were laid onto RNAi plates. Animals were harvested as  
432 L4/young adults and subject to Western blot analysis as described above.

433

#### 434 Chromatin and RNA immunoprecipitation (ChIP-QPCR and RIP-QPCR)

435 ChIP-QPCR assay was carried out as before with modifications. Briefly, CW-  
436 treated animals (4°C for 4 hrs, recovered at 25°C for 1 hr) and control (25°C) animals  
437 were harvested and washed by 1 X PBS. The pellet animals were resuspended in cross-  
438 linking buffer (1% formaldehyde in 1 X PBS) followed by homogenization using  
439 TissueRuptor with Motor unit “4” for 1 min at room temperature. The process was then  
440 stopped by addition of glycine (125 mM final concentration). After washing and discarding  
441 the supernatant, the pellet was resuspended in lysis buffer and lysed by TissueRuptor  
442 with Motor unit “6” for 1 min on ice, with lysate kept on ice for additional 3 min, and then  
443 repeated 3 times. The lysate was centrifuged to collect the supernatant and one percent  
444 of the aliquot was used as “Input”. Lysate was precleared by adding salmon sperm  
445 DNA/protein-A agarose beads (Bioworld, 20182011-1), rotating at 4°C for 1 hour. After  
446 centrifugation, supernatant was divided equally and added with 50 µg Flag antibody  
447 (Sigma, F3165) and mouse IgG (Santa Cruz Biotechnology, sc-2025) respectively. The  
448 samples were incubated and rotated overnight at 4°C. Next, salmon sperm DNA/protein-  
449 A agarose beads were added for 2 hrs at 4°C. The beads-antibody-TF-DNA complex was  
450 washed extensively and the complex and input were diluted with proteinase K buffer. The  
451 samples were then incubated at 55°C for 4 hrs and then at 65°C overnight to reverse  
452 crosslink. DNA was extracted by phenol-chloroform-isoamylalcohol (Sigma-Aldrich,

453 77617). *asp-17* promoter was measured by QPCR and calculated by the percent input  
454 method. Primers for ChIP-QPCR: *asp-17* promoter (Forward,  
455 TTCGCTGCACCTATATGTTG; Reverse, CCGCTAATACCCTTATCAC).

456 RNA immunoprecipitation (RIP)-QPCR assay was carried out as before with  
457 modifications to accommodate our reagents (Kershner and Kimble, 2010). Briefly,  
458 synchronous day-1 *isy-1p::isy-1::mcherry* animals were divided into two groups. One  
459 group is control (25°C) and the other is cold-warming (4°C for 4 hours, recovered at 25°C  
460 for 1 hour). Animals were harvested and washed by M9 buffer until the supernatant was  
461 clear, and then washed once in buffer A and twice in lysis buffer. About 250 µl worm  
462 pellets were frozen in liquid nitrogen twice and homogenized using TissueRuptor with  
463 Motor unit “4” for 1 min on ice. The lysate was kept on ice for 15 min and centrifuged to  
464 collect the supernatant and 1% of the aliquot was kept as “Input”. Equal amount of  
465 supernatant was added with RFP-Trap®\_MA (Chromotek) and rotated for 4 hrs at 4°C.  
466 IP magnetic agarose beads were washed and 10% of IP beads were boiled for 6 min in  
467 2X Laemmli Sample Buffer. RNA was eluted from remaining beads using 200 µl lysis  
468 buffer of Quick-RNA MiniPrepkit (Zymo Research, R1055) and extracted following the  
469 instruction. RNA was quantified with a Nanodrop device. 500 ng RNA was reverse  
470 transcribed into cDNA and Qpcr was performed as before. Relative mRNA was calculated  
471 by THE percent input method. Primers for RIP-qPCR: Primary *mir-60* Forward  
472 TCGAAAACCGCTTGTCTTG, Reverse CGATTTCTCAAGTCTTGAAGTAG; *cebp-1*  
473 Forward GATCCTTCGCAAGACAAGAC, Reverse CACATTGTCGGTAGGAACGTC.

474

475 Cold tolerance assay

476           Animals were cultured under non-starved conditions for at least 4 generations at  
477 25°C before cold tolerance assay. For cold tolerance assay of L1-stage animals, bleach-  
478 synchronized populations were kept at 4°C for 96 hrs and then recovered for 4 hrs at  
479 25°C. For cold tolerance assay of adults, animals were raised at 25°C from hatching with  
480 excessive bacteria food on agar plates. Well-fed L4 stage animals were transferred to  
481 new plates and kept at 25°C overnight to reach day-1 adulthood. To cold shock the  
482 animals, agar plates were spread with equal distance on a thin plastic board and  
483 transferred to a constant 4°C cold room for the indicated duration. After cold shock,  
484 animals were then moved to 25°C for recovery for 4 hrs before scoring survival rates.  
485 Animals were scored as dead if they showed no movement upon light touch.

486

487 Imaging and fluorescence quantification

488           smFISH of *C. elegans* and imaging were performed as previously described (Ji  
489 and Oudenaarden, 2005). For Nomarski and fluorescence imaging, spinning-disc  
490 confocal and digital automated epifluorescence microscopes (EVOS, Life Technologies)  
491 were used to capture images of animals after RNAi or CW treatments. Synchronous  
492 population of worms were randomly picked and treated with 1 mM levamisole water  
493 solution to paralyze the animals. The animals were mounted on an agar pad on a slide  
494 and aligned for imaging. Identical conditions and settings were used for both control and  
495 test groups. For quantification of fluorescence images, the animals in the images were  
496 outlined and signals were quantified by ImageJ software. The intensity of an individual

497 animal was obtained by dividing the total signal by the area of that animal. The average  
498 intensity of the control group was set to be 1.0, to which all other intensities were  
499 normalized. Graphpad Prism software was used to plot the data.

500

#### 501 Small RNA-seq and bioinformatics

502 For small RNA sequencing, total RNA was isolated by the Quick-RNA MiniPrep kit  
503 (Zymo Research, R1055) that yields total RNA including small RNAs ranging 17-200 nt.  
504 RNA samples extracted from triplicate N2 animals and *isy-1* mutants were submitted to  
505 Beijing Genomics Institute for small RNA library construction and sequencing. The low-  
506 quality reads were filtered and clean reads were mapped to the *C. elegans* genome using  
507 Bowtie2 program (Langmead and Salzberg, 2012). MiRDeep2 (Friedländer et al., 2012)  
508 was used to characterize known and predict novel miRNAs. The small RNA expression  
509 level was calculated as TPM (transcript per million). Differentially expressed small RNAs  
510 were detected by DESeq2 (Love et al., 2014). The threshold for differentially expressed  
511 sRNAs was adjusted P-value  $\leq 0.05$  and the absolute value of Log<sub>2</sub>ratio  $\geq 1$ . Targets of  
512 miRNAs were predicted by TargetScan (Jan et al., 2011), RNAhybrid (Krüger and  
513 Rehmsmeier, 2006) and miRanda (John et al., 2004) using default parameters.

514

#### 515 Statistical analysis

516 Data were analyzed using GraphPad Prism Software (Graphpad, San Diego, CA) and  
517 presented as means  $\pm$  S.D. unless otherwise specified with p values calculated by

518 unpaired Student's t-tests, one-way or two-way ANOVA (comparisons across more than  
519 two groups) and adjusted with Bonferroni's corrections.

520

## 521 **Acknowledgements**

522 We thank the *Caenorhabditis* Genetics Center, National BioResource Project in Japan  
523 and the Million Mutation Project for *C. elegans* strains. The work was supported by NIH  
524 grants R01GM117461, R00HL116654, ADA grant 1-16-IBS-197, Pew Scholar Award,  
525 Alfred P. Sloan Foundation Fellowship, and Packard Fellowship in Science and  
526 Engineering (D.K.M), R01AG032435 (Y.W.) and a CPSF postdoctoral fellowship (W.J.).

527

## 528 **References**

529 Al-Fageeh, M.B., and Smales, C.M. (2006). Control and regulation of the cellular responses to  
530 cold shock: the responses in yeast and mammalian systems. *Biochem. J.* 397, 247–259.

531 Bailey, T.L., Boden, M., Buske, F.A., Frith, M., Grant, C.E., Clementi, L., Ren, J., Li, W.W., and  
532 Noble, W.S. (2009). MEME SUITE: tools for motif discovery and searching. *Nucleic Acids Res.*  
533 37, W202-208.

534 Baird, N.A., Douglas, P.M., Simic, M.S., Grant, A.R., Moresco, J.J., Wolff, S.C., Yates, J.R.,  
535 Manning, G., and Dillin, A. (2014). HSF-1-mediated cytoskeletal integrity determines  
536 thermotolerance and life span. *Science* 346, 360–363.

537 Bautista, D.M. (2015). Spicy science: David Julius and the discovery of temperature-sensitive  
538 TRP channels. *Temp. Austin Tex* 2, 135–141.

539 Bindea, G., Mlecnik, B., Hackl, H., Charoentong, P., Tosolini, M., Kirilovsky, A., Fridman, W.-H.,  
540 Pagès, F., Trajanoski, Z., and Galon, J. (2009). ClueGO: a Cytoscape plug-in to decipher  
541 functionally grouped gene ontology and pathway annotation networks. *Bioinforma. Oxf. Engl.*  
542 25, 1091–1093.

543 Brenner, S. (1974). The genetics of *Caenorhabditis elegans*. *Genetics* 77, 71–94.

- 544 Brunquell, J., Morris, S., Lu, Y., Cheng, F., and Westerheide, S.D. (2016). The genome-wide  
545 role of HSF-1 in the regulation of gene expression in *Caenorhabditis elegans*. *BMC Genomics*  
546 17.
- 547 Choi, H.A., Badjatia, N., and Mayer, S.A. (2012). Hypothermia for acute brain injury--  
548 mechanisms and practical aspects. *Nat. Rev. Neurol.* 8, 214–222.
- 549 Chüeh, A.C., Tse, J.W., Dickinson, M., Ioannidis, P., Jenkins, L., Tögel, L., Tan, B., Luk, I.,  
550 Dávalos-Salas, M., Nightingale, R., et al. (2017). ATF3 repression of BCL-XL determines  
551 apoptotic sensitivity to HDAC inhibitors across tumour types. *Clin. Cancer Res.*  
552 *clincanres.0466.2017*.
- 553 Davis, M.W., Hammarlund, M., Harrach, T., Hullett, P., Olsen, S., and Jorgensen, E.M. (2005).  
554 Rapid single nucleotide polymorphism mapping in *C. elegans*. *BMC Genomics* 6, 118.
- 555 Dempersmier, J., Sambeat, A., Gulyaeva, O., Paul, S.M., Hudak, C.S.S., Raposo, H.F., Kwan,  
556 H.-Y., Kang, C., Wong, R.H.F., and Sul, H.S. (2015). Cold-inducible Zfp516 activates UCP1  
557 transcription to promote browning of white fat and development of brown fat. *Mol. Cell* 57, 235–  
558 246.
- 559 Dix, I., Russell, C., Yehuda, S.B., Kupiec, M., and Beggs, J.D. (1999). The identification and  
560 characterization of a novel splicing protein, *Isy1p*, of *Saccharomyces cerevisiae*. *RNA N. Y. N* 5,  
561 360–368.
- 562 Du, P., Wang, L., Sliz, P., and Gregory, R.I. (2015). A Biogenesis Step Upstream of  
563 Microprocessor Controls miR-17~92 Expression. *Cell* 162, 885–899.
- 564 Fan, W., and Evans, R.M. (2015). Turning up the heat on membrane fluidity. *Cell* 161, 962–963.
- 565 Friedländer, M.R., Mackowiak, S.D., Li, N., Chen, W., and Rajewsky, N. (2012). miRDeep2  
566 accurately identifies known and hundreds of novel microRNA genes in seven animal clades.  
567 *Nucleic Acids Res.* 40, 37–52.
- 568 Frøkjaer-Jensen, C., Davis, M.W., Hopkins, C.E., Newman, B.J., Thummel, J.M., Olesen, S.-P.,  
569 Grunnet, M., and Jorgensen, E.M. (2008). Single-copy insertion of transgenes in *Caenorhabditis*  
570 *elegans*. *Nat. Genet.* 40, 1375–1383.
- 571 Galej, W.P., Wilkinson, M.E., Fica, S.M., Oubridge, C., Newman, A.J., and Nagai, K. (2016).  
572 Cryo-EM structure of the spliceosome immediately after branching. *Nature* 537, 197–201.
- 573 Garrity, P.A., Goodman, M.B., Samuel, A.D., and Sengupta, P. (2010). Running hot and cold:  
574 behavioral strategies, neural circuits, and the molecular machinery for thermotaxis in *C. elegans*  
575 and *Drosophila*. *Genes Dev.* 24, 2365–2382.
- 576 Giuliodori, A.M., Di Pietro, F., Marzi, S., Masquida, B., Wagner, R., Romby, P., Gualerzi, C.O.,  
577 and Pon, C.L. (2010). The *cspA* mRNA is a thermosensor that modulates translation of the cold-  
578 shock protein *CspA*. *Mol. Cell* 37, 21–33.
- 579 Gomez-Pastor, R., Burchfiel, E.T., and Thiele, D.J. (2017). Regulation of heat shock  
580 transcription factors and their roles in physiology and disease. *Nat. Rev. Mol. Cell Biol.*

- 581 Hamilton, W.D. (1963). The Evolution of Altruistic Behavior. *Am. Nat.* 97, 354–356.
- 582 Hartman, M.G., Lu, D., Kim, M.-L., Kociba, G.J., Shukri, T., Buteau, J., Wang, X., Frankel, W.L.,  
583 Guttridge, D., Prentki, M., et al. (2004). Role for Activating Transcription Factor 3 in Stress-  
584 Induced  $\beta$ -Cell Apoptosis. *Mol. Cell. Biol.* 24, 5721–5732.
- 585 Hwang, A.B., and Lee, S.-J. (2011). Regulation of life span by mitochondrial respiration: the  
586 HIF-1 and ROS connection. *Aging* 3, 304–310.
- 587 Jan, C.H., Friedman, R.C., Ruby, J.G., and Bartel, D.P. (2011). Formation, regulation and  
588 evolution of *Caenorhabditis elegans* 3'UTRs. *Nature* 469, 97–101.
- 589 Ji, N., and Oudenaarden, A. van (2005). Single molecule fluorescent in situ hybridization  
590 (smFISH) of *C. elegans* worms and embryos (WormBook).
- 591 John, B., Enright, A.J., Aravin, A., Tuschl, T., Sander, C., and Marks, D.S. (2004). Human  
592 MicroRNA targets. *PLoS Biol.* 2, e363.
- 593 Kamath, R.S., and Ahringer, J. (2003). Genome-wide RNAi screening in *Caenorhabditis*  
594 *elegans*. *Methods San Diego Calif* 30, 313–321.
- 595 Kandror, O., Bretschneider, N., Kreydin, E., Cavalieri, D., and Goldberg, A.L. (2004). Yeast  
596 adapt to near-freezing temperatures by STRE/Msn2,4-dependent induction of trehalose  
597 synthesis and certain molecular chaperones. *Mol. Cell* 13, 771–781.
- 598 Kato, M., Kashem, M.A., and Cheng, C. (2016). An intestinal microRNA modulates the  
599 homeostatic adaptation to chronic oxidative stress in *C. elegans*. *Aging* 8, 1979–2005.
- 600 Kershner, A.M., and Kimble, J. (2010). Genome-wide analysis of mRNA targets for  
601 *Caenorhabditis elegans* FBF, a conserved stem cell regulator. *Proc. Natl. Acad. Sci. U. S. A.*  
602 107, 3936–3941.
- 603 Kim, D., Langmead, B., and Salzberg, S.L. (2015). HISAT: a fast spliced aligner with low  
604 memory requirements. *Nat. Methods* 12, 357–360.
- 605 Krüger, J., and Rehmsmeier, M. (2006). RNAhybrid: microRNA target prediction easy, fast and  
606 flexible. *Nucleic Acids Res.* 34, W451-454.
- 607 Kumsta, C., Chang, J.T., Schmalz, J., and Hansen, M. (2017). Hormetic heat stress and HSF-1  
608 induce autophagy to improve survival and proteostasis in *C. elegans*. *Nat. Commun.* 8, 14337.
- 609 Landis, J.N., and Murphy, C.T. (2010). Integration of diverse inputs in the regulation of  
610 *Caenorhabditis elegans* DAF-16/FOXO. *Dev. Dyn. Off. Publ. Am. Assoc. Anat.* 239, 1405–1412.
- 611 Langmead, B., and Salzberg, S.L. (2012). Fast gapped-read alignment with Bowtie 2. *Nat.*  
612 *Methods* 9, 357–359.
- 613 Liao, Y., Smyth, G.K., and Shi, W. (2014). featureCounts: an efficient general purpose program  
614 for assigning sequence reads to genomic features. *Bioinforma. Oxf. Engl.* 30, 923–930.
- 615 Longo, V.D., Mitteldorf, J., and Skulachev, V.P. (2005). Programmed and altruistic ageing. *Nat.*  
616 *Rev. Genet.* 6, 866–872.



- 617 Love, M.I., Huber, W., and Anders, S. (2014). Moderated estimation of fold change and  
618 dispersion for RNA-seq data with DESeq2. *Genome Biol.* *15*, 550.
- 619 Lyons, J.M., Keith, A.D., and Thomason, I.J. (1975). Temperature-induced phase transitions in  
620 nematode lipids and their influence on respiration. *J. Nematol.* *7*, 98–104.
- 621 Ma, D.K., Vozdek, R., Bhatla, N., and Horvitz, H.R. (2012). CYSL-1 interacts with the O<sub>2</sub>-  
622 sensing hydroxylase EGL-9 to promote H<sub>2</sub>S-modulated hypoxia-induced behavioral plasticity in  
623 *C. elegans*. *Neuron* *73*, 925–940.
- 624 Ma, D.K., Li, Z., Lu, A.Y., Sun, F., Chen, S., Rothe, M., Menzel, R., Sun, F., and Horvitz, H.R.  
625 (2015). Acyl-CoA Dehydrogenase Drives Heat Adaptation by Sequestering Fatty Acids. *Cell*  
626 *161*, 1152–1163.
- 627 Maere, S., Heymans, K., and Kuiper, M. (2005). BiNGO: a Cytoscape plugin to assess  
628 overrepresentation of gene ontology categories in biological networks. *Bioinforma. Oxf. Engl.*  
629 *21*, 3448–3449.
- 630 Mahat, D.B., Salamanca, H.H., Duarte, F.M., Danko, C.G., and Lis, J.T. (2016). Mammalian  
631 Heat Shock Response and Mechanisms Underlying Its Genome-wide Transcriptional  
632 Regulation. *Mol. Cell* *62*, 63–78.
- 633 Mello, C.C., Kramer, J.M., Stinchcomb, D., and Ambros, V. (1991). Efficient gene transfer in  
634 *C.elegans*: extrachromosomal maintenance and integration of transforming sequences. *EMBO*  
635 *J.* *10*, 3959–3970.
- 636 Metzstein, M.M., Stanfield, G.M., and Horvitz, H.R. (1998). Genetics of programmed cell death  
637 in *C. elegans*: past, present and future. *Trends Genet. TIG* *14*, 410–416.
- 638 Morrison, S.F. (2016). Central control of body temperature. *F1000Research* *5*.
- 639 Murray, P., Hayward, S.A.L., Govan, G.G., Gracey, A.Y., and Cossins, A.R. (2007). An explicit  
640 test of the phospholipid saturation hypothesis of acquired cold tolerance in *Caenorhabditis*  
641 *elegans*. *Proc. Natl. Acad. Sci. U. S. A.* *104*, 5489–5494.
- 642 Ohta, A., Ujisawa, T., Sonoda, S., and Kuhara, A. (2014). Light and pheromone-sensing  
643 neurons regulates cold habituation through insulin signalling in *Caenorhabditis elegans*. *Nat.*  
644 *Commun.* *5*, ncomms5412.
- 645 Peng, Y., Zhang, M., Zheng, L., Liang, Q., Li, H., Chen, J.-T., Guo, H., Yoshina, S., Chen, Y.-Z.,  
646 Zhao, X., et al. (2017). Cysteine protease cathepsin B mediates radiation-induced bystander  
647 effects. *Nature* *547*, 458–462.
- 648 Peter, M.E. (2011). Programmed cell death: Apoptosis meets necrosis. *Nature* *471*, 310–312.
- 649 Polderman, K.H. (2009). Mechanisms of action, physiological effects, and complications of  
650 hypothermia. *Crit. Care Med.* *37*, S186-202.
- 651 Ritchie, A., Gutierrez, O., and Fernandez-Luna, J.L. (2009). PAR bZIP-bik is a novel  
652 transcriptional pathway that mediates oxidative stress-induced apoptosis in fibroblasts. *Cell*  
653 *Death Differ.* *16*, 838–846.



- 654 Sapolsky, R.M. (2004). Why Zebras Don't Get Ulcers, Third Edition (New York: Holt  
655 Paperbacks).
- 656 Schmieder, R., and Edwards, R. (2011). Quality control and preprocessing of metagenomic  
657 datasets. *Bioinforma. Oxf. Engl.* 27, 863–864.
- 658 Skulachev, V.P. (1999). Phenoptosis: programmed death of an organism. *Biochem. Biokhimiia*  
659 64, 1418–1426.
- 660 Skulachev, V.P. (2002). Programmed death phenomena: from organelle to organism. *Ann. N. Y.*  
661 *Acad. Sci.* 959, 214–237.
- 662 Smith, J.M. (1964). Group Selection and Kin Selection. *Nature* 201, 1145–1147.
- 663 Solís, E.J., Pandey, J.P., Zheng, X., Jin, D.X., Gupta, P.B., Airoidi, E.M., Pincus, D., and Denic,  
664 V. (2016). Defining the Essential Function of Yeast Hsf1 Reveals a Compact Transcriptional  
665 Program for Maintaining Eukaryotic Proteostasis. *Mol. Cell* 63, 60–71.
- 666 Tansey, E.A., and Johnson, C.D. (2015). Recent advances in thermoregulation. *Adv. Physiol.*  
667 *Educ.* 39, 139–148.
- 668 Thorvaldsdóttir, H., Robinson, J.T., and Mesirov, J.P. (2013). Integrative Genomics Viewer  
669 (IGV): high-performance genomics data visualization and exploration. *Brief. Bioinform.* 14, 178–  
670 192.
- 671 Vriens, J., Nilius, B., and Voets, T. (2014). Peripheral thermosensation in mammals. *Nat. Rev.*  
672 *Neurosci.* 15, 573–589.
- 673 Yenari, M.A., and Han, H.S. (2012). Neuroprotective mechanisms of hypothermia in brain  
674 ischaemia. *Nat. Rev. Neurosci.* 13, 267–278.
- 675 Yura, T., Nagai, H., and Mori, H. (1993). Regulation of the heat-shock response in bacteria.  
676 *Annu. Rev. Microbiol.* 47, 321–350.
- 677 Zhou, X., Feng, X., Mao, H., Li, M., Xu, F., Hu, K., and Guang, S. (2017). RdRP-synthesized  
678 antisense ribosomal siRNAs silence pre-rRNA via the nuclear RNAi pathway. *Nat. Struct. Mol.*  
679 *Biol.* 24, 258–269.
- 680 Zhu, J.-K. (2016). Abiotic Stress Signaling and Responses in Plants. *Cell* 167, 313–324.

681

## 682 **Figure legends**

683 **Figure 1: *asp-17* is robustly and specifically induced by cold-warming. A**, Volcano  
684 plot of RNA-seq showing differentially regulated genes (up-regulated genes in red;  
685 down-regulated genes in green; *asp-17* was indicated by purple dot) by cold-warming in

686 wild type *C. elegans*. **B**, RNA-seq reads at the *asp-17* locus showing consistent up-  
687 regulation of *asp-17* transcript levels in triplicate samples after cold-warming. **C**, QPCR  
688 measurements of gene expression levels showing up-regulation of three representative  
689 CW inducible genes, including *asp-17*, after shifting from 25°C to different degrees of  
690 hypothermia (4, 10, 15 and 22°C) lasting 2 hrs followed by recovery at 25°C for 0.5 hr.  
691 **D**, Quantification of RNA-seq reads indicating specific up-regulation of *asp-17* but not  
692 other members of the *asp* family genes (only expressed *asp* genes are shown). **E**,  
693 QPCR measurements of *asp-17* levels under conditions of indicated durations of cold  
694 and warming (with or without 25°C recovery for “yes/no”). **F**, smFISH images showing  
695 *asp-17* up-regulation (signals indicated by yellow) by CW predominantly in the intestine  
696 of wild type but not *asp-17* null animals.  $n \geq 20$  total animals for each group with  $N \geq 3$   
697 independent biological replicates; \*\*\* indicates  $P < 0.001$ . Scale bar: 50  $\mu\text{m}$ .

698

699 **Figure 2: A forward genetic screen identifies *C. elegans isy-1* as a causal**  
700 **regulator of *asp-17::GFP* expression. A**, Schematic of the *C. elegans* ISY-1 protein  
701 showing the domain structure predicted by SMART (top) ([http://smart.embl-](http://smart.embl-heidelberg.de)  
702 [heidelberg.de](http://smart.embl-heidelberg.de)) and a multiple sequence alignment of ISY-1 homologues from major  
703 metazoans showing the conservation of the glutamate residue substituted to lysine by  
704 the *dma50* mutation isolated from EMS screens. **B**, Nomarski and fluorescence images  
705 showing the phenotype of intestinal *asp-17p::GFP* in wild type and *dma50* mutants. **C**,  
706 Fluorescence images showing the distribution of ISY-1::GFP driven by the endogenous  
707 *isy-1* promoter. Arrows indicate neuronal, hypodermal and intestinal nuclei. **D**, Nomarski  
708 and fluorescence images showing intestinal *asp-17p::GFP* in a transgenic strain

709 expressing RNAi against *isy-1* specifically in intestine. **E**, Schematic of the *C. elegans*  
710 *isy-1* gene with mCherry tagged at the C-terminus (top); Nomarski and fluorescence  
711 images showing rescue of *dma50* by various transgenes (below). **F**, Quantification of  
712 fluorescence intensities showing rescue of *dma50* in *asp-17p::GFP* activation.  $N \geq 3$   
713 independent biological replicates; \*\*\* indicates  $P < 0.001$ . Scale bar: 20  $\mu\text{m}$ .

714

715 **Figure 3: ZIP-10 acts downstream of ISY-1 and mediates transcriptional response**  
716 **to CW. A**, QPCR measurements of *asp-17* levels induced by CW in wild type and *isy-*  
717 *1(dma50)* mutants. **B**, Volcano plot of RNA-seq showing differentially regulated genes  
718 (up-regulated genes in red; down-regulated genes in green) in *isy-1* mutants compared  
719 with wild type. **C**, RNA-seq measurements of expression levels for indicated genes in  
720 wild type and *isy-1(dma50)* mutants. **D**, Nomarski and fluorescence images showing  
721 *asp-17p::GFP* induction by *isy-1* RNAi was blocked in *zip-10* mutants. **E**, Western blots  
722 of the integrated *zip-10p::zip-10::EGFP::FLAG* strain showing time-dependent protein  
723 induction by CW. **F**, Western blots of the integrated *zip-10p::zip-10::EGFP::FLAG* strain  
724 showing its up-regulation by *isy-1* RNAi and down-regulation by *GFP* or *zip-10* RNAi.  
725 Both short- and long-exposure blots are shown. **G**, Western blots of the integrated *zip-*  
726 *10p::zip-10::EGFP::FLAG* strain showing its up-regulation strictly required warming after  
727 cold shock. **H**, Western blots of the integrated *zip-10p::zip-10::EGFP::FLAG* strain  
728 showing its up-regulation by CW was further enhanced by *isy-1* RNAi. **I**, QPCR  
729 measurements of gene expression levels showing ZIP-10 dependent up-regulation of  
730 *asp-17* and *cpr-3* but not *srr-6* or *F53B9.1* after cold for indicated durations and 1-hr

731 warming.  $n \geq 20$  total animals for each group with  $N \geq 3$  independent biological  
732 replicates; \*\*\* indicates  $P < 0.001$ . Scale bar: 20  $\mu\text{m}$ .

733

734 **Figure 4: ISY-1 regulates *zip-10* via *mir-60*.** **A**, Western blot of mCherry/RFP-trapped  
735 RNA immunoprecipitates in animals treated with or without cold-warming. **B**, QPCR  
736 measurements of the percent input for primary *mir-60* transcripts from mCherry/RFP-  
737 trapped RNA immunoprecipitates in animals treated with or without cold-warming. **C**,  
738 QPCR measurements of the percent input for *cbp-1* transcripts from mCherry/RFP-  
739 trapped RNA immunoprecipitates in animals treated with or without cold-warming. **D**,  
740 QPCR measurements of the mature *mir-60* transcript levels from wild type, *isy-*  
741 *1(dma50)* and *mir-60(n4947)* deletion mutants. **E**, QPCR measurements of the levels of  
742 CW-inducible gene transcripts in animals with indicated genotypes and conditions. **F**,  
743 Western blot of lysates from animals carrying the array *ges-1p::mCherry::3'utr(zip-10)*  
744 reporters with CW or *isy-1* RNAi. No change of reporter activity was observed. **G**,  
745 Western blot of lysates from animals carrying *zip-10p::zip-10::EGFP::FLAG* reporters  
746 with various indicated CW and RNAi conditions.  $n \geq 20$  total animals for each group with  
747  $N \geq 3$  independent biological replicates; \*\*\* indicates  $P < 0.001$ ; \*\* indicates  $P < 0.01$ .

748

749 **Figure 5: ISY-1 and ZIP-10 regulate a genetic program to promote organismic**  
750 **death.** **A**, Venn diagram indicating numbers of genes commonly regulated by CW and  
751 *isy-1(dma50)* mutants. **B**, Scatter plot depicting the correlation between the  
752 transcriptome response to cold (y-axis) and the transcriptome response to *isy-1*

753 mutation (x-axis). Shown are the log<sub>2</sub> fold changes compared with corresponding  
754 controls. Pearson correlation coefficient and the associated P-value were calculated  
755 using R functions. **C**, AT-rich motif identified by MEME enriched among the CW and *isy-*  
756 *1(dma50)* regulated genes, with a table listing numbers of the motif present in top-  
757 ranked 4 genes. **D**, ChIP-QPCR measurements of ZIP-10::FLAG binding to the *asp-17*  
758 promoter. **E**, Survival rates of indicated genotypes after prolonged CW (4°C for 48 hrs  
759 followed by 4 hrs of warming). **F**, Organismic death rates of indicated genotypes after  
760 heat shock (32°C) induction of *zip-10* wild type, mutant with defective transactivation C-  
761 terminus, *zip-2* and *zip-11* (left), without CW. Nomarski image (right) indicate  
762 morphologies of normal and dead animals with induction of *zip-10*. **G**, RNA-seq  
763 measurements of gene targets of indicated TFs. **H**, Table showing the *asp-17p::GFP*  
764 and cold tolerance phenotypes of animals with indicated genotypes. **I**, Model for the role  
765 and regulation of the ZIP-10 pathway. n ≥ 20 total animals for each group with N ≥ 3  
766 independent biological replicates; \*\*\* indicates P < 0.001.

767

768 **Figure 1-figure supplement 1: RNA-seq identified genes up-regulated by cold-**  
769 **warming. A**, Hierarchical clustering analysis of genes up- and down-regulated genes by  
770 CW. **B**, Gene ontology analysis of genes up- and down-regulated genes by CW.

771

772 **Figure 2-figure supplement 1: EMS screens identified *isy-1* as a regulator of *asp-***  
773 **17. A**, Fluorescence images showing up-regulation of *asp-17p::GFP* but not the co-  
774 injection marker *unc-54p::mCherry* by CW. **B**, Schematic illustrating the workflow of

775 EMS mutagenesis to isolate mutants with abnormal *asp-17p::GFP* expression. **C**, Table  
776 showing the mutants isolated from the screen, including *dma50* that defines the gene  
777 *F53B7.3*, named as *isy-1*. **D**, Chromosome genetic maps showing Dral SNP sites and  
778 the mapped interval for *dma50*. **E**, Table listing candidate genes with mutations  
779 identified by WGS, with two genes highlighted in yellow within the mapped interval. **F**,  
780 fluorescence images showing that RNAi of *isy-1* phenocopies *dma50*.  $N \geq 3$   
781 independent biological replicates; \*\*\* indicates  $P < 0.001$ . Scale bar: 20  $\mu\text{m}$ .

782

783 **Figure 2-figure supplement 2: ISY-1 is a *C. elegans* member of evolutionarily**  
784 **conserved protein family and its level is not regulated by cold-warming. **A**,**  
785 Multiple sequence alignment (Cluster Omega, visualized by Jalview) of ISY-1 family  
786 members in major metazoan species. **B**, Cladogram of ISY family proteins. **C**, Sanger  
787 sequencing confirmation of *isy-1(dma50)*. **D**, RNA-seq measurements of *isy-1* and *asp-*  
788 *17* levels under CW conditions and in *isy-1(dma50)* mutants. **E**, Western blot of *isy-*  
789 *1p::ISY-1::mCherry* showing no regulation by CW.  $N \geq 3$  independent biological  
790 replicates; \*\*\* indicates  $P < 0.001$ .

791

792 **Figure 3-figure supplement 1: ISY-1 does not affect general splicing of a GFP**  
793 **reporter nor specific splicing of *zip-10*. **A**,** Nomarski and fluorescence images  
794 showing that animals with *isy-1* RNAi are not defective in general intron splicing of an  
795 *eft-3p::GFP* (intron-containing) reporter. **B**, Read plot from RNA-seq of wild type at the  
796 *zip-10* locus. **C**, Read plot from RNA-seq of *isy-1(dma50)* mutants at the *zip-10* locus

797 indicating the intact splicing of the *zip-10* intron despite increased mRNA levels. **D**,  
798 Normalized QPCR measurements of mRNA expression levels of *isy-1* and *zip-10* from  
799 wild type and *isy-1(dma50)* mutants. **E**, Normalized QPCR measurements of mRNA  
800 expression levels of *isy-1* and *zip-10* from wild type and CW-treated animals.

801

802 **Figure 3-figure supplement 2: Mechanisms of regulation and function of *zip-10*. A**,  
803 Nomarski and fluorescence images showing the *zip-10p::GFP* reporter activated by *isy-*  
804 *1* RNAi. **B**, Western blot of lysates from *zip-10p::zip-10::EGFP::FLAG* transgenic  
805 animals showing its increased abundance after CW but not by hypoxia (0.5% O<sub>2</sub>) or  
806 starvation for 24 hrs. **C**, Western blot of fractionated lysates from *zip-10p::zip-*  
807 *10::EGFP::FLAG* transgenic animals after CW showing its increased abundance in  
808 cytosol and nucleus. **D**, Western blot of lysates from *zip-10p::zip-10::EGFP::FLAG*  
809 transgenic animals showing its increased abundance after CW when warming was  
810 permitted and cold exposure was prolonged. **E**, Western blot of lysates from *zip-*  
811 *10p::zip-10::FLAG* transgenic and various RNAi treated animals showing its increased  
812 abundance after CW in *isy-1* RNAi treated animals but was unaffected by RNAi against  
813 *C37C3.2*, encoding the *C. elegans* orthologue of translation initiation factor 5 (eIF5), or  
814 *T26A8.4*, encoding the *C. elegans* orthologue of *Saccharomyces cerevisiae* Caf120, a  
815 component of the Ccr4-Not deadenylase RNA-degrading complex. **F**, ZIP-10 domain  
816 organization based on analysis by SMART ([smart.embl-heidelberg.de](http://smart.embl-heidelberg.de)) and modeled  
817 structure of ZIP-10's bZIP domain ([swissmodel.expasy.org](http://swissmodel.expasy.org)). **G**, Sequence alignment of  
818 ZIP-10's bZIP domain and the Maf transcription factor as a template of the modelled  
819 ZIP-10 structure. **H**, Schematic of the *zip-10* locus showing the wild type, EGFP::FLAG



820 tagged allele, and the wild-type and C-terminal transactivation mutant ZIP-10 protein  
821 sequences. The mutated residues (from Q and N to V and A, respectively) at the ZIP-10  
822 C-terminus are completely conserved in nematodes.

823

824 **Figure 4-figure supplement 1: A specific subset of CW-inducible genes is**  
825 **dependent on ZIP-10.** Shown is a table of fold induction for gene expression levels  
826 determined by QPCR measurements of top-ranked randomly selected CW-inducible  
827 genes in wild type and *zip-10* mutant animals.

828

829 **Figure 5-figure supplement 1: Identification of differentially regulated microRNAs**  
830 **in wild type and *isy-1(dma50)* mutants. A,** Summary table showing the read statistics  
831 for the small RNA-seq experiments using three biologically triplicate samples in wild  
832 type and *isy-1(dma50)* mutants. **B,** Small RNA length distribution plots for wild type and  
833 *isy-1(dma50)* mutants. **C,** Distribution graphs for various types of small RNAs identified  
834 by small RNA sequencing for wild type and *isy-1(dma50)* mutants. **D,** Volcano plot  
835 showing the differentially regulated microRNAs, including *mir-60*, in the *isy-1(dma50)*  
836 mutants (three replicates each). **E,** Schematic of two examples illustrating the TF-  
837 encoding genes, *skn-1* and *daf-16* at 3' UTRs, targeted by two microRNAs, *mir-51* and  
838 *mir-359*, respectively, which are down-regulated in *isy-1(dma50)* mutants. **F,**  
839 Hierarchical clustering analysis of microRNAs up- or down-regulated in *isy-1(dma50)*  
840 mutants. *mir-51* and *mir-359* down-regulation were indicated by arrows.

841



842 **Figure 5-figure supplement 2: ZIP-10 constitutes a genetic program promoting kin**  
843 **selection of *C. elegans* under resource-limiting and stress conditions. A,**  
844 Mathematical model illustrating the advantage of wild-type (red line) versus *zip-10* KO  
845 animals (blue line) at the population level under growth resource-limiting and thermal  
846 stress conditions. Individual fitness distribution (x-axis) after cold-warming thermal  
847 stress is set to be exponential (thin red line) and linear (thin blue line) to fit the  
848 phenotypic differences in death rates of wild type and *zip-10* KO animals and to simplify  
849 comparison and calculation. Given the same period of time and the same amount of  
850 growth resources (integral differences between thin and thick lines), wild-type  
851 population yields more thermal stress-adapted reproducing animals than *zip-10*  
852 deficient animals. The parameters for integrals were adjusted so that the “growth  
853 resources” are the same despite that the population growth modes are different for wild  
854 type and *zip-10* KO. **B,** Schematic illustrating an exemplar situation of the mathematical  
855 model in which 5 post-reproduction adults and 5 larvae are living in a food-limiting  
856 condition. After cold-warming thermal stress, wild-type adults die out, leaving food for  
857 young larvae to grow into reproductive adults whereas *zip-10* KO post-reproduction  
858 adults do not die, consuming the limited food and competing out the young larvae so  
859 that fewer reproductively active *zip-10* KO animals emerge from such conditions. **C,**  
860 Experimental evidence indicating the specific induction of *zip-10p::zip-10::EGFP::FLAG*  
861 by CW as measured by Western blot in adults but not in larvae. **D,** Survival rates of wild  
862 type and *zip-10* KO (*ok3462*) animals at different stages after prolonged CW thermal  
863 stresses (96-hr cold shock for L1 while 48-hr for others) showing that ZIP-10’s pro-death

864 effects are more prominent in old animals.  $n \geq 20$  total animals for each group with  $N \geq$   
865 3 independent biological replicates; \*\*\* indicates  $P < 0.001$ , \*\* indicates  $P < 0.01$ .

866

867 **Figure 1-source data 1:** Lists of genes up- and down-regulated by CW with adjusted P  
868  $< 0.05$  and log2FoldChange from biological triplicate samples of wild-type *C. elegans*.

869 **Figure 3-source data 1:** Lists of genes up- and down-regulated by the *isy-1(dma50)*  
870 mutation with adjusted  $P < 0.05$  and log2FoldChange from biological triplicate samples  
871 of wild-type and *isy-1(dma50)* mutant *C. elegans*.

872 **Figure 5-source data 1:** Lists of genes commonly regulated by CW and the *isy-*  
873 *1(dma50)* mutation with adjusted  $P < 0.05$  and log2FoldChange from biological triplicate  
874 samples of wild-type and *isy-1(dma50)* mutant *C. elegans*.

bioRxiv preprint doi: <https://doi.org/10.1101/271106>; this version posted February 26, 2018. The copyright holder for this preprint (which was not certified by peer review) is the author/funder, who has granted bioRxiv a license to display the preprint in perpetuity. It is made available under aCC-BY 4.0 International license.

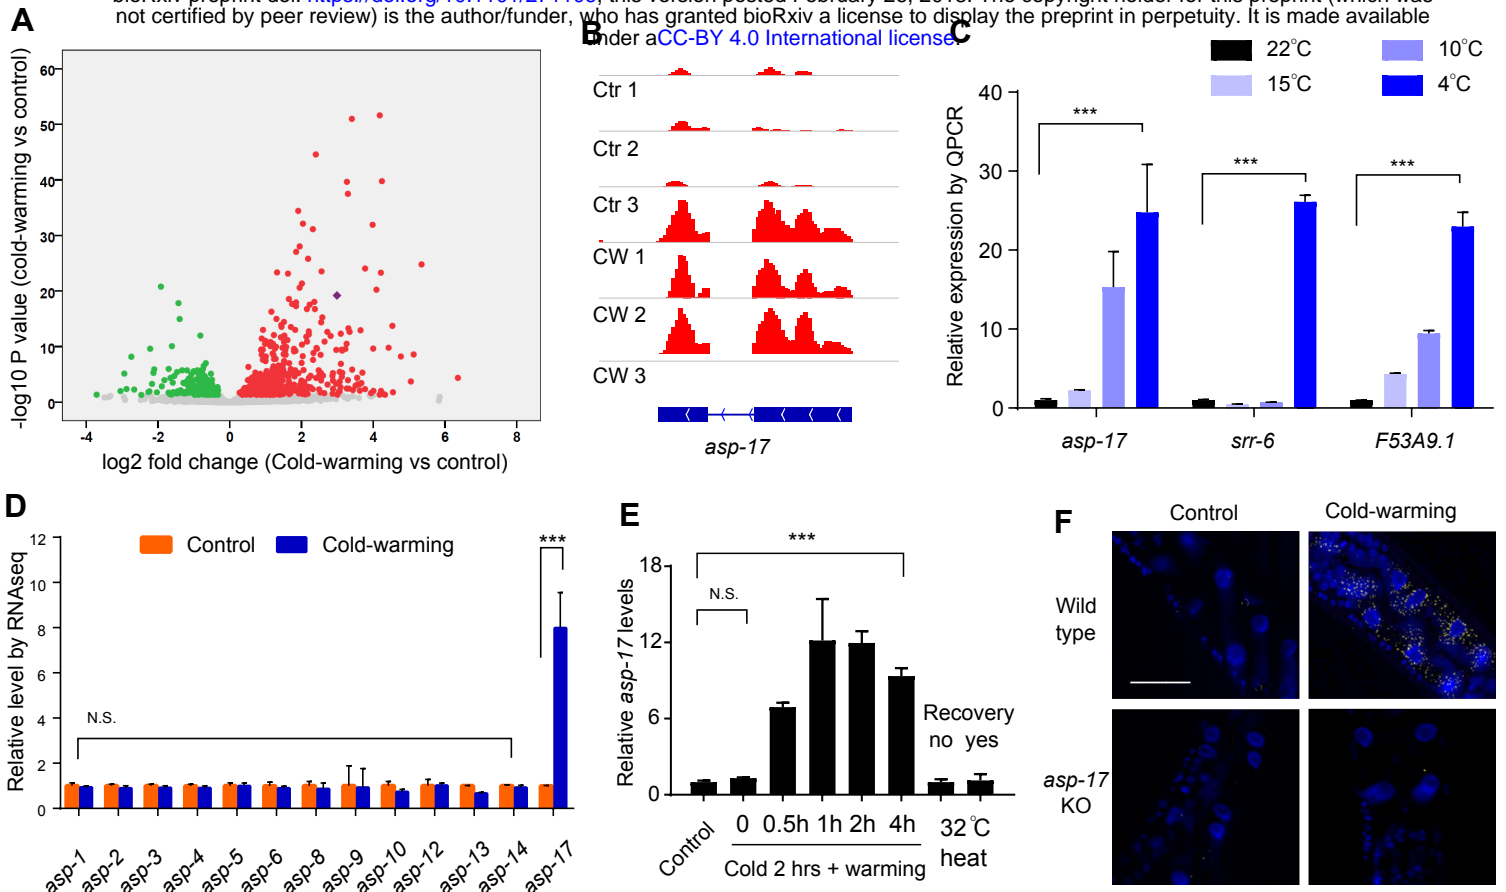

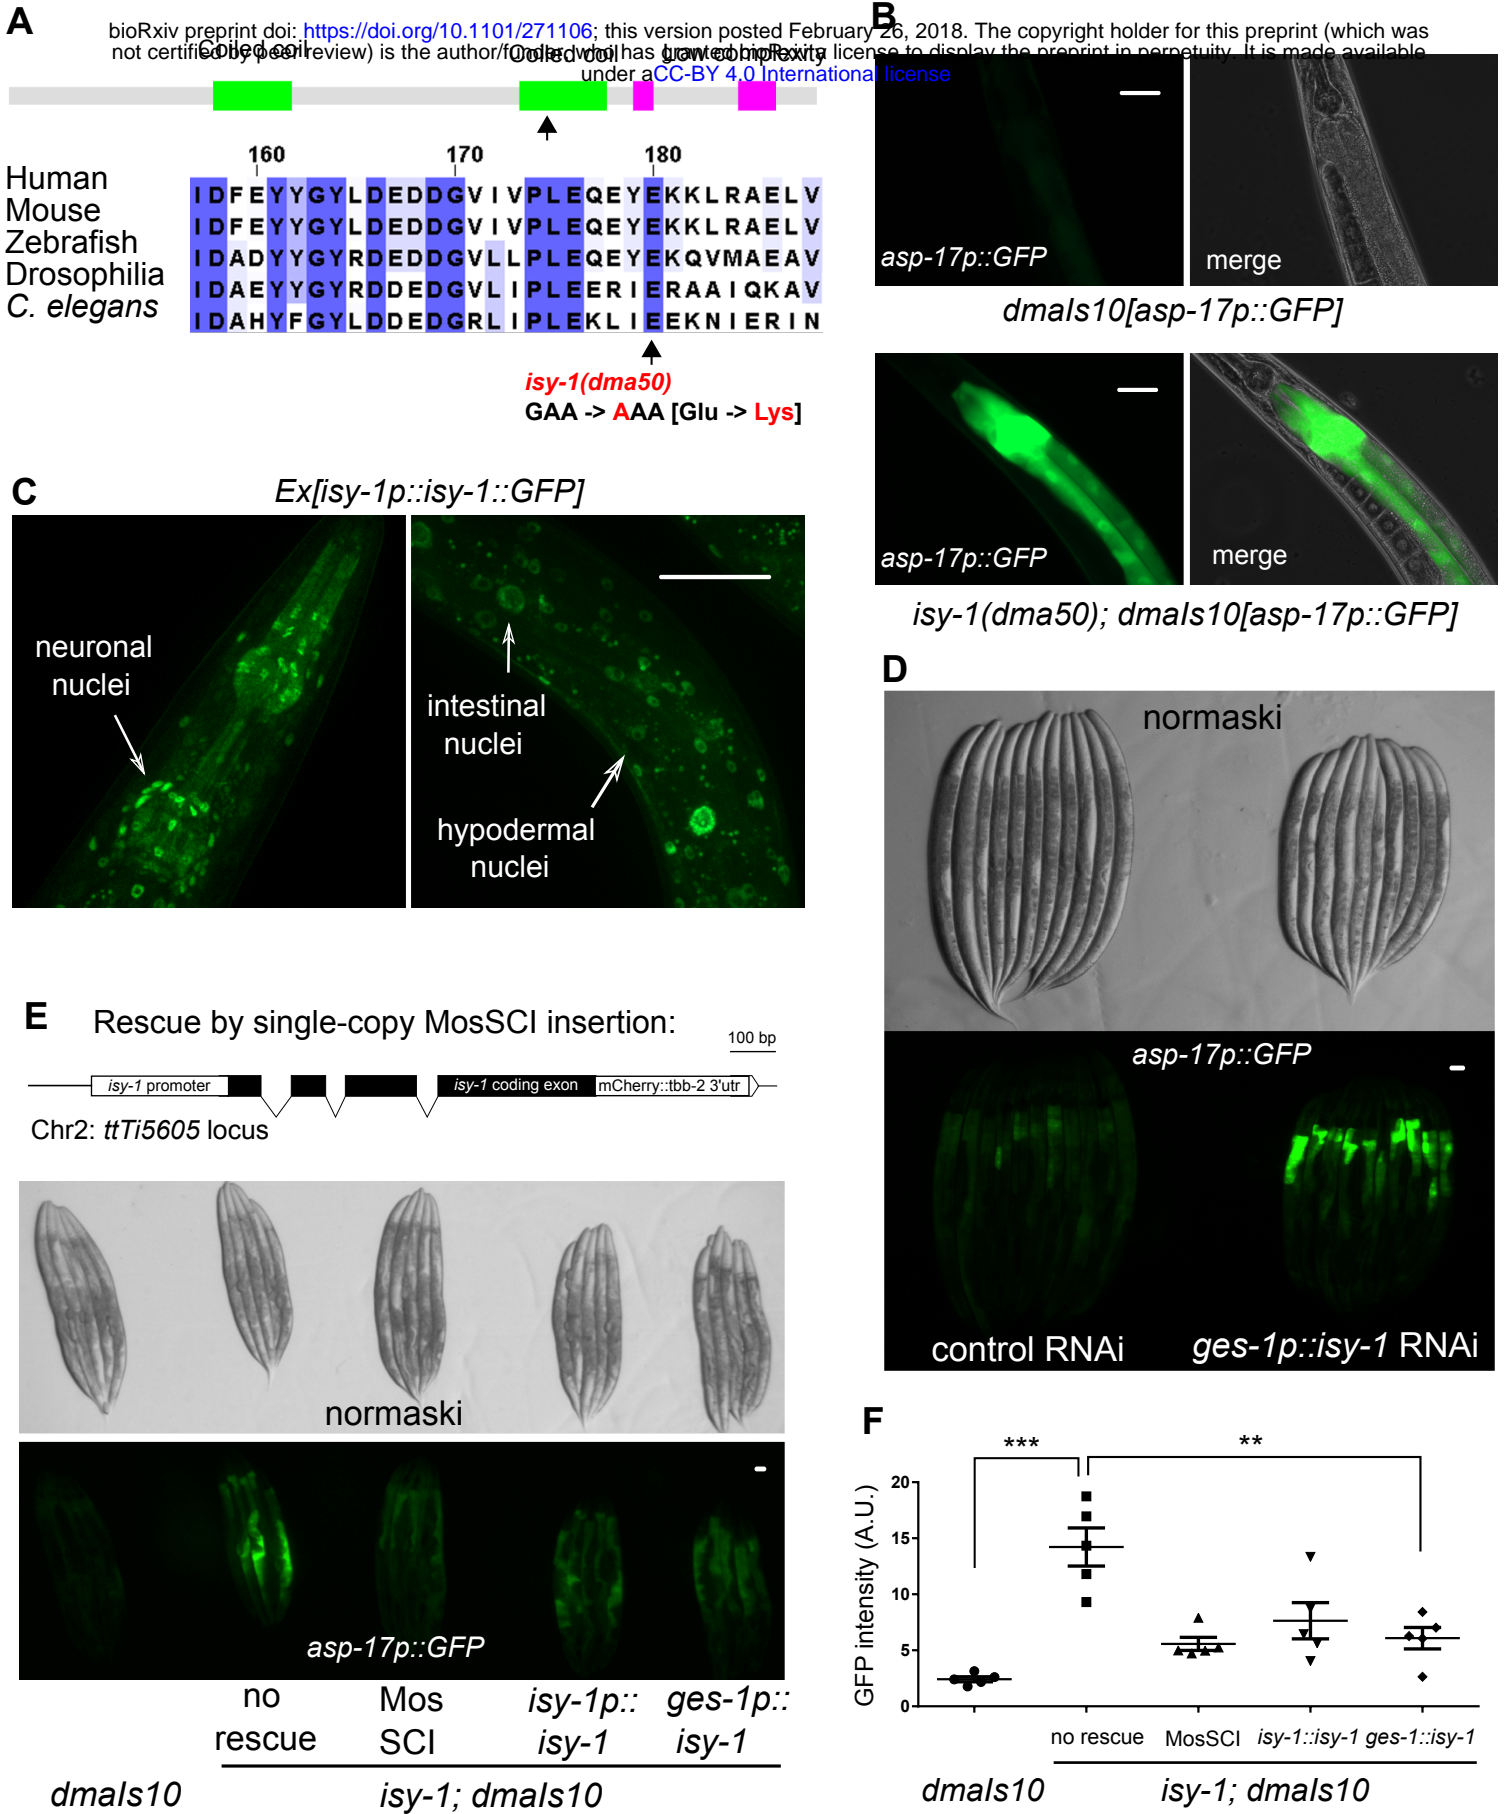

bioRxiv preprint doi: <https://doi.org/10.1101/271106>; this version posted February 26, 2018. The copyright holder for this preprint (which was not certified by peer review) is the author/funder, who has granted bioRxiv a license to display the preprint in perpetuity. It is made available under aCC-BY 4.0 International license.

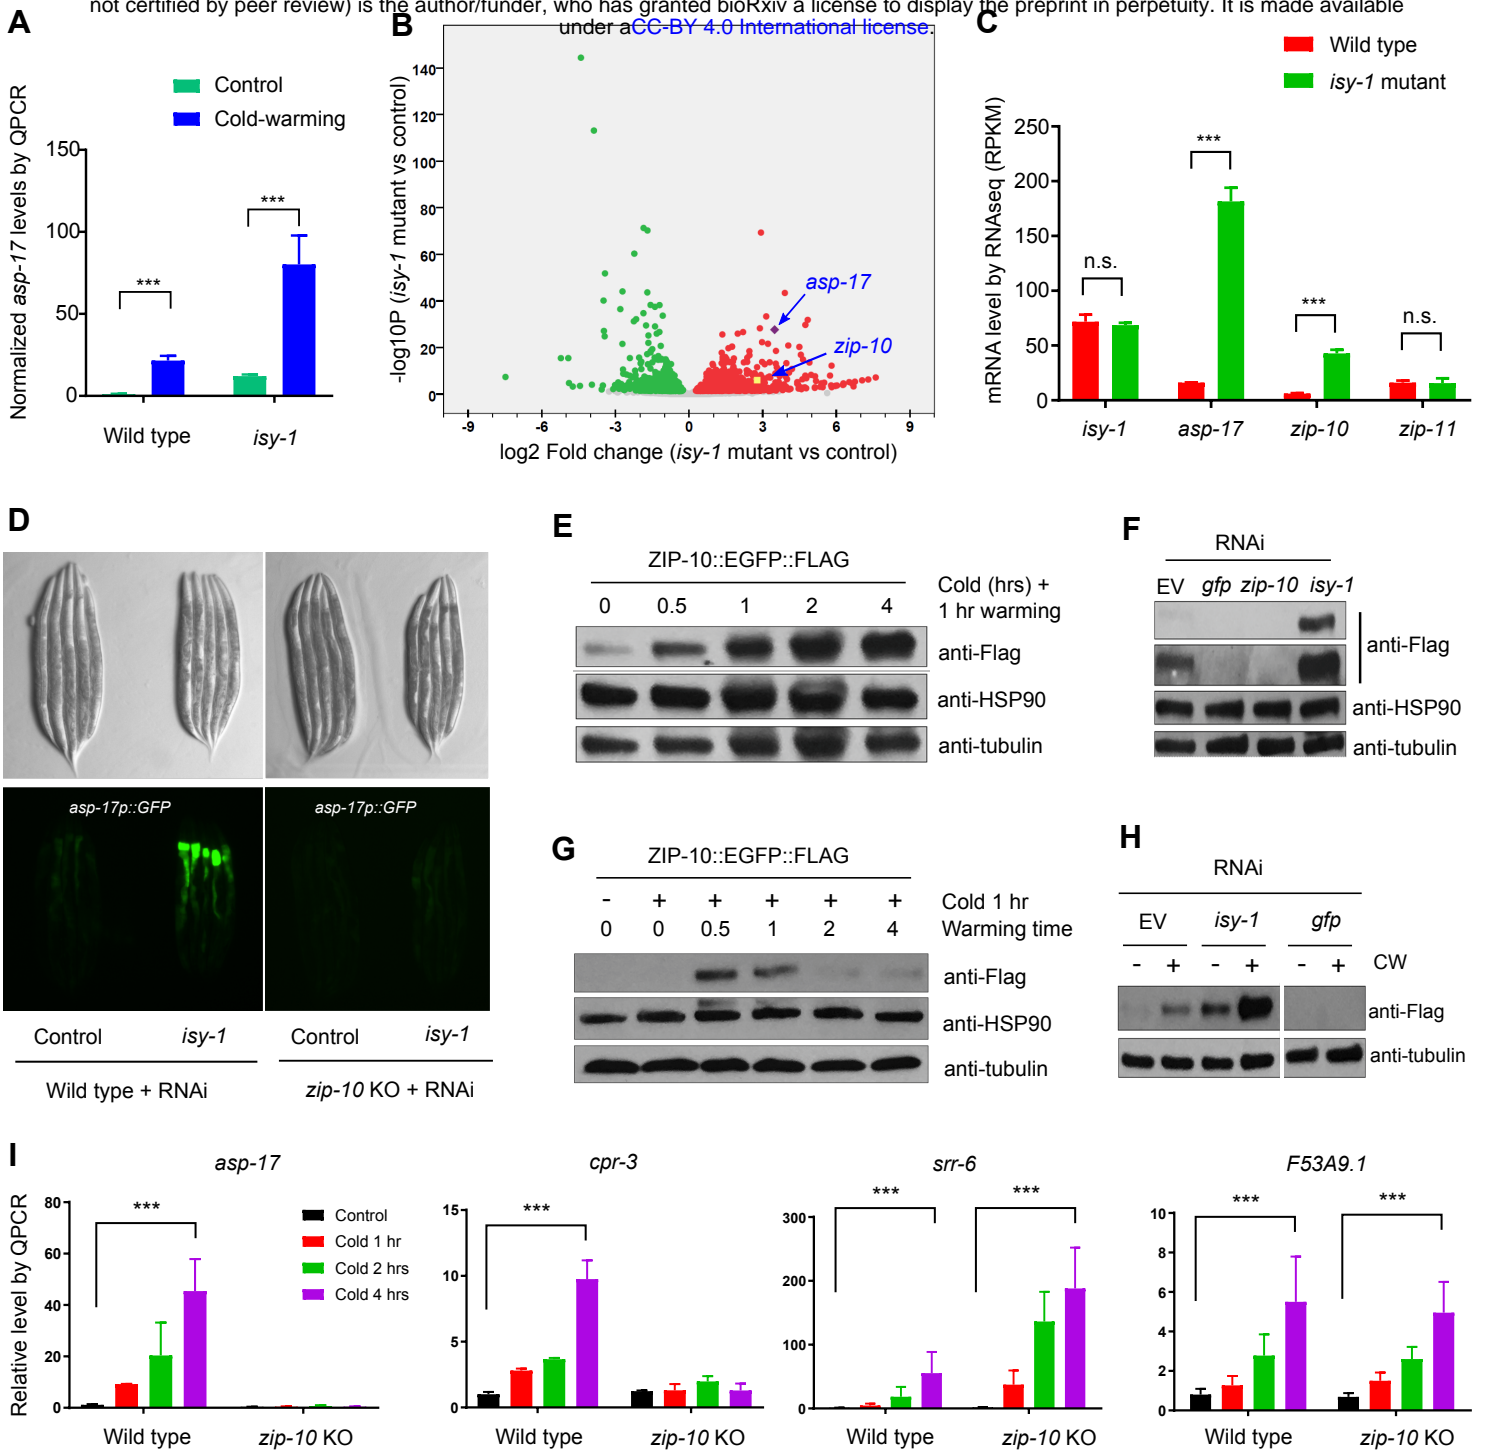

bioRxiv preprint doi: <https://doi.org/10.1101/271106>; this version posted February 26, 2018. The copyright holder for this preprint (which was not certified by peer review) is the author/funder, who has granted bioRxiv a license to display the preprint in perpetuity. It is made available under aCC-BY 4.0 International license.

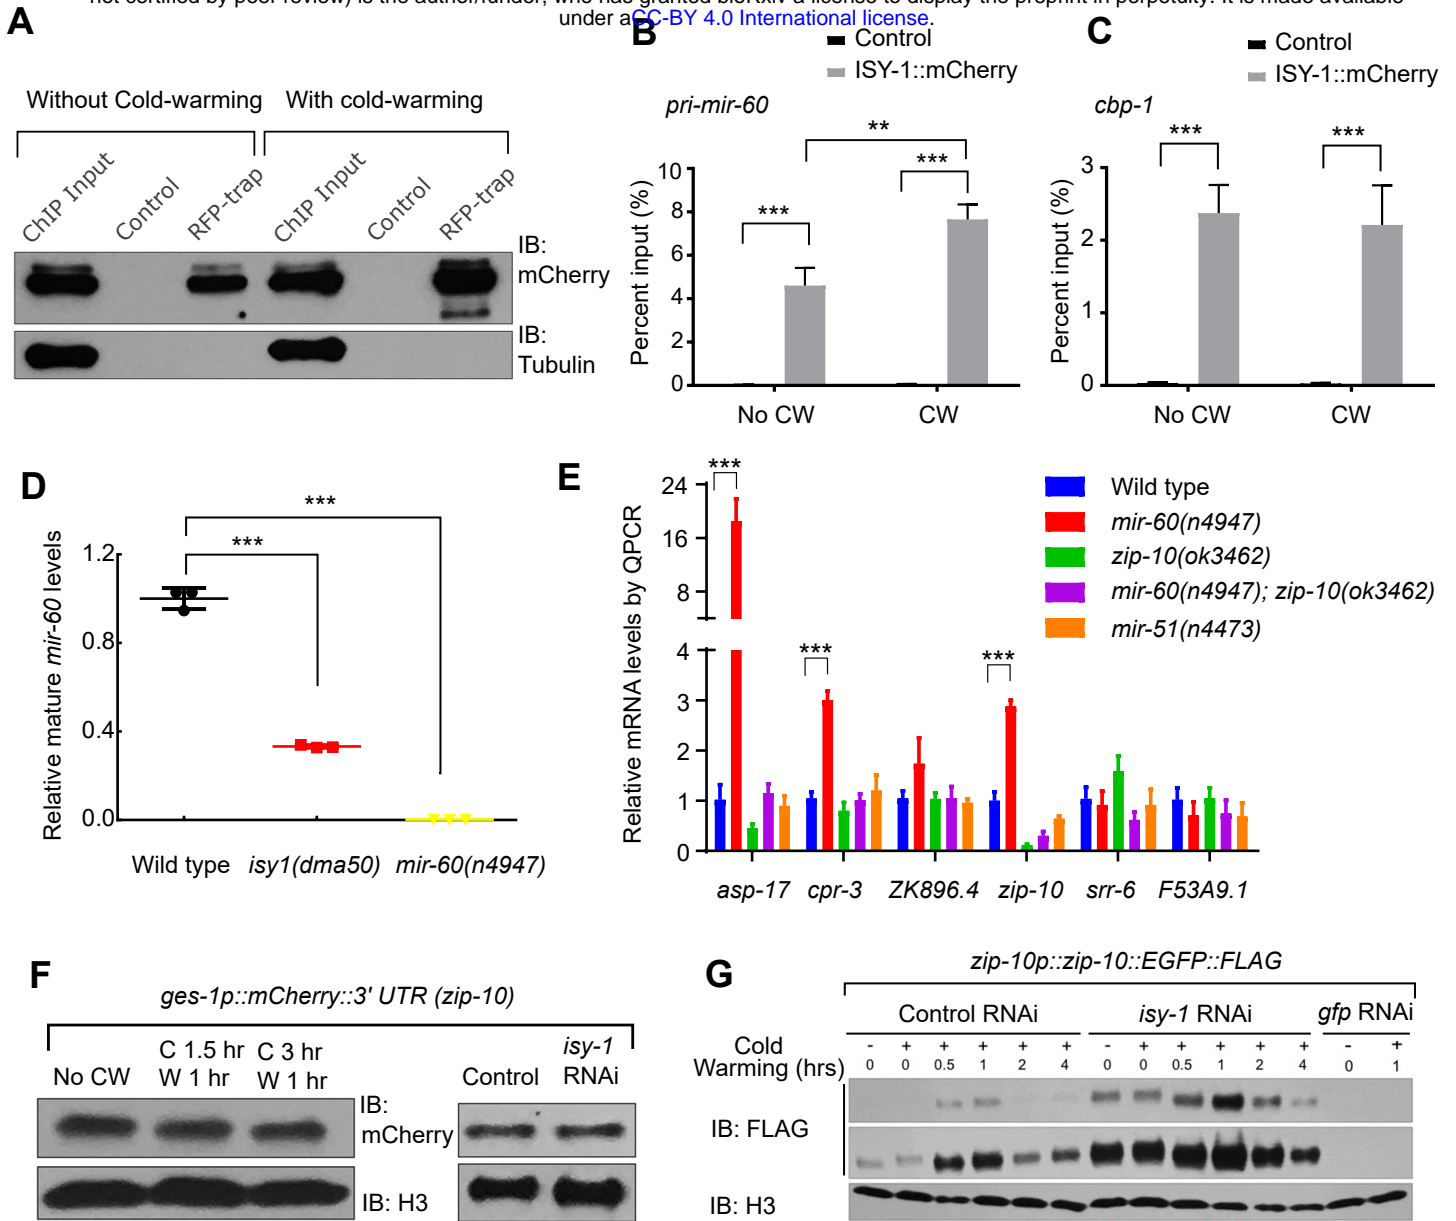

**Fig. 5**

bioRxiv preprint doi: <https://doi.org/10.1101/271106>; this version posted February 26, 2018. The copyright holder for this preprint (which was not certified by peer review) is the author/funder, who has granted bioRxiv a license to display the preprint in perpetuity. It is made available under aCC-BY 4.0 International license.

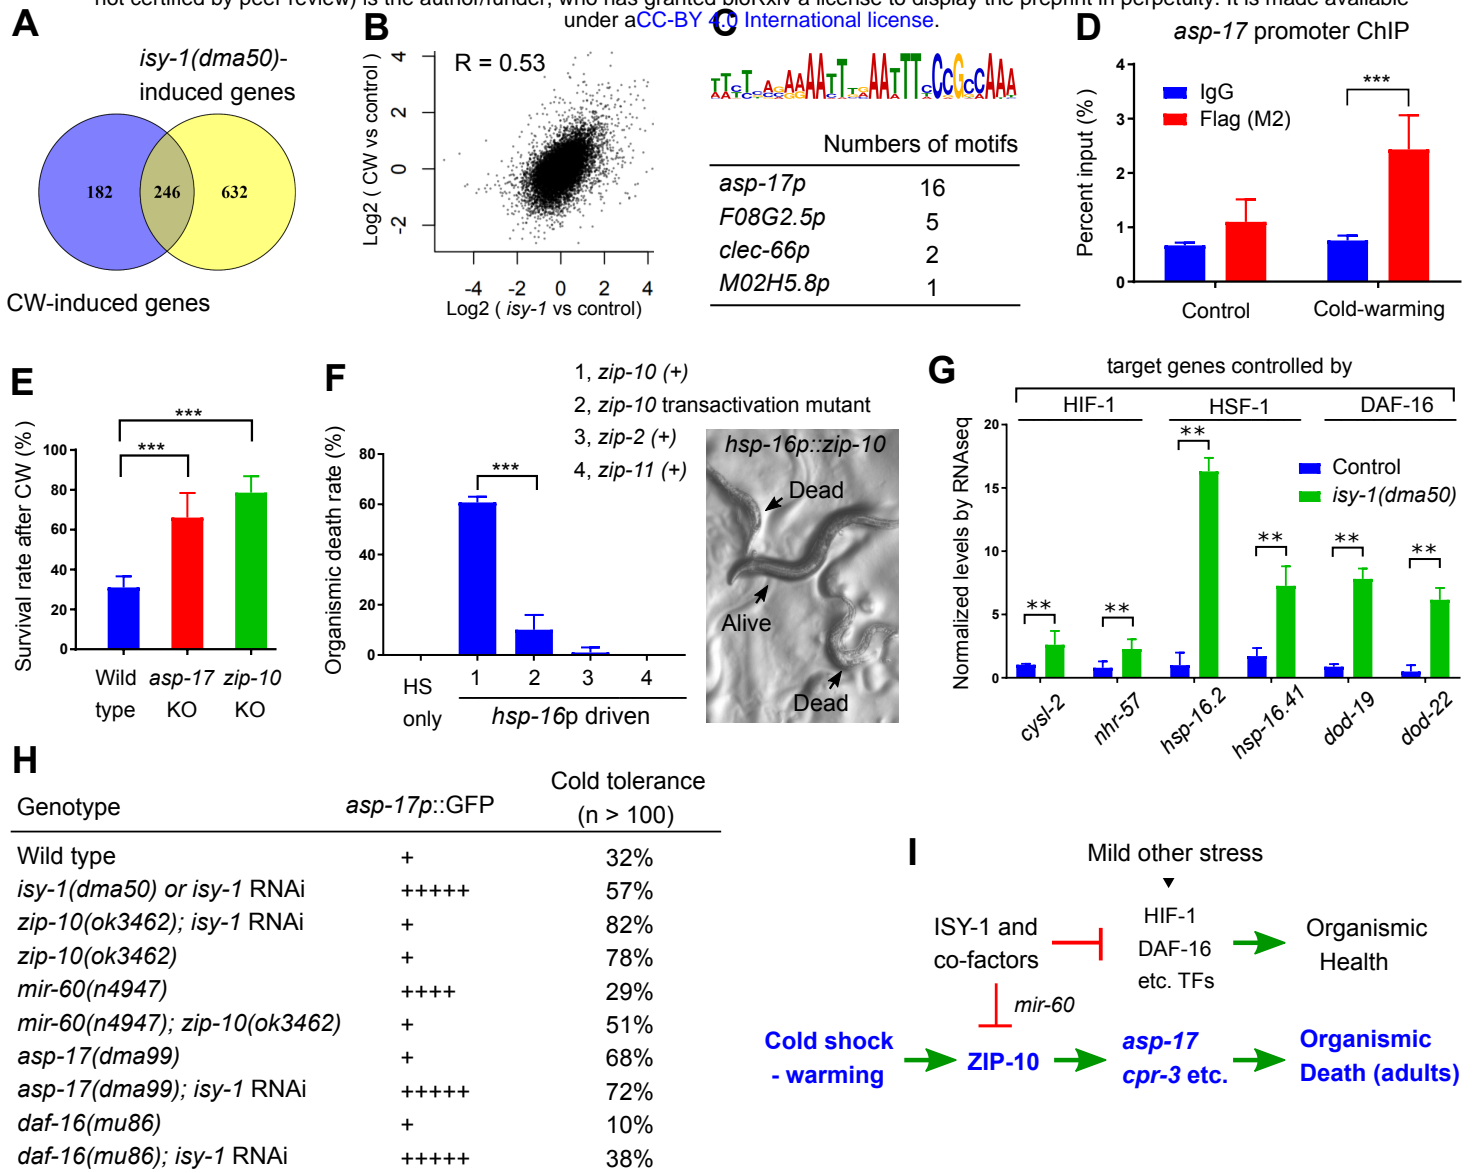



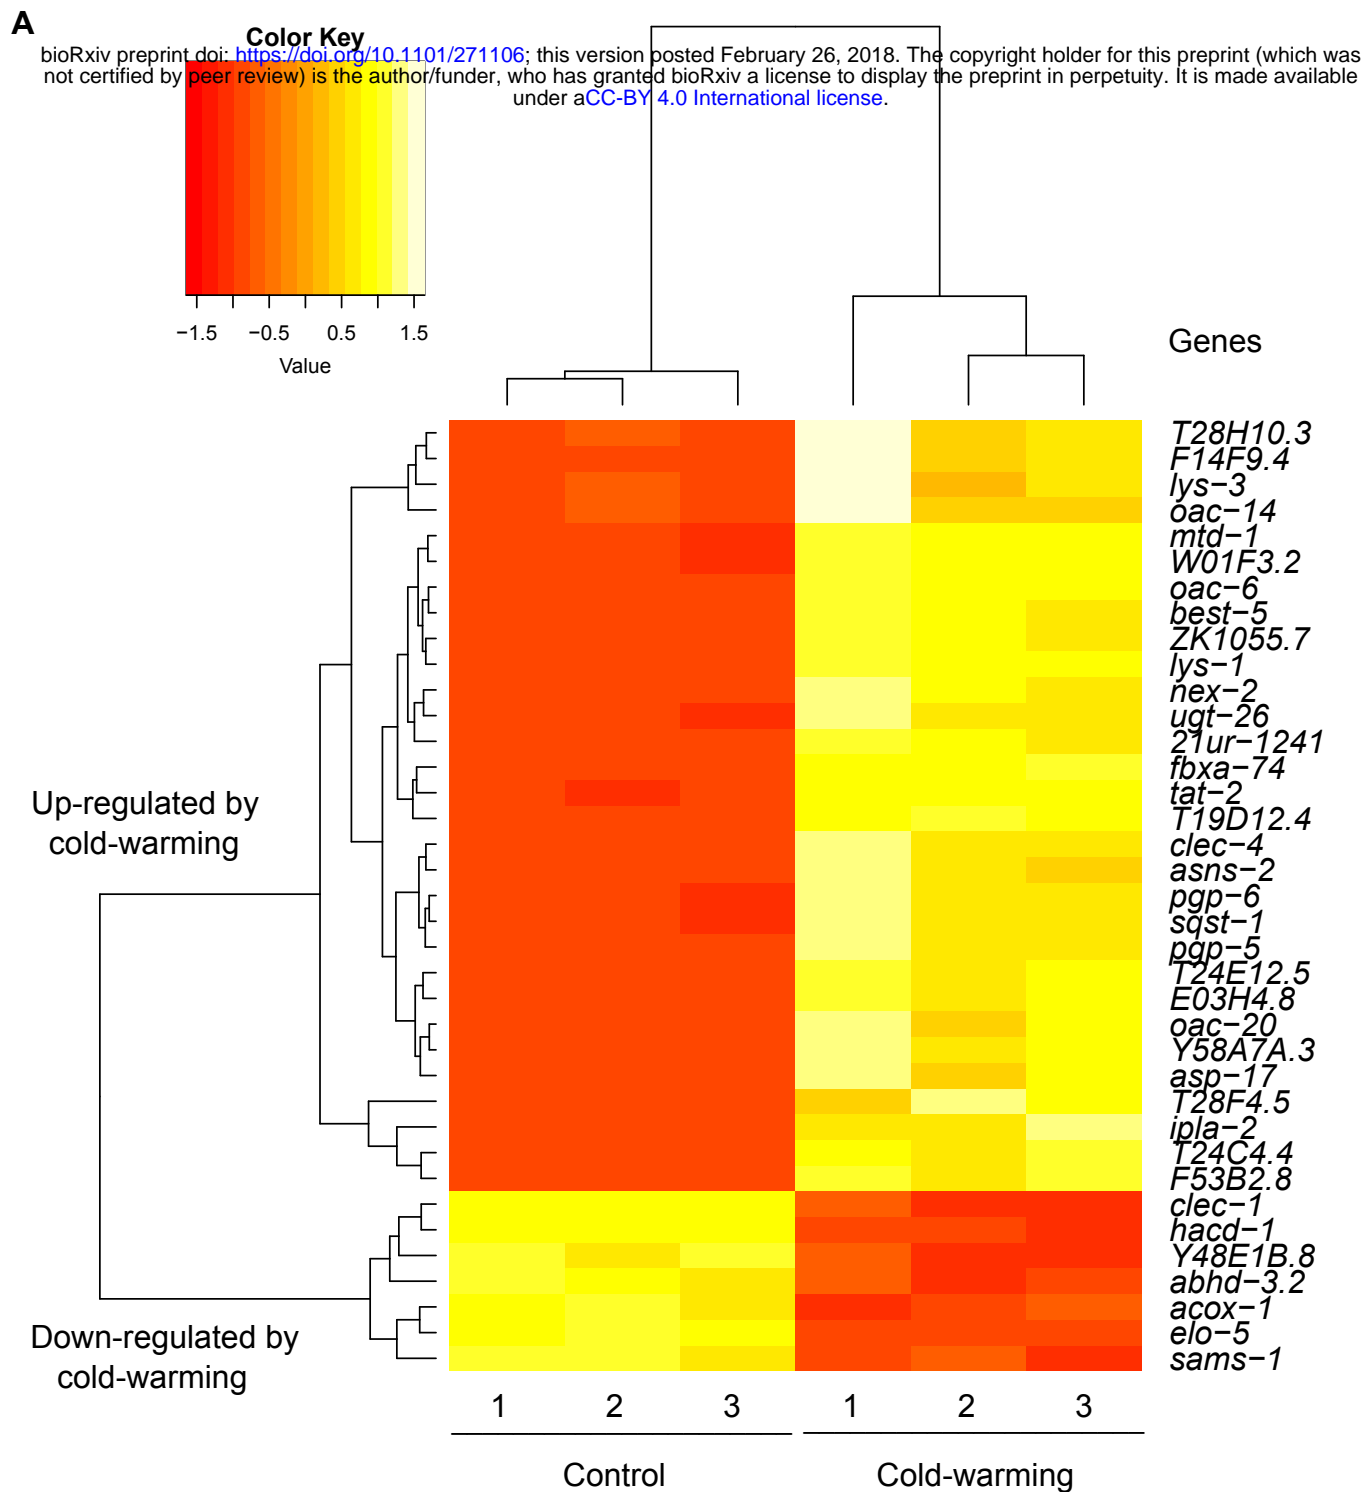

**B**

| GOID       | GO Term                                     | Term P-Value |
|------------|---------------------------------------------|--------------|
| KEGG:00071 | Fatty acid degradation                      | 0.068035515  |
| KEGG:00330 | Arginine and proline metabolism             | 0.012703481  |
| KEGG:00564 | Glycerophospholipid metabolism              | 0.027845609  |
| KEGG:02010 | ABC transporters                            | 6.87E-07     |
| KEGG:04068 | FoxO signaling pathway                      | 0.099454727  |
| KEGG:04136 | Autophagy                                   | 0.010025137  |
| KEGG:04137 | Mitophagy                                   | 0.002142392  |
| KEGG:04140 | Autophagy                                   | 0.007908727  |
| KEGG:04141 | Protein processing in endoplasmic reticulum | 0.129746247  |
| KEGG:04144 | Endocytosis                                 | 0.005199927  |
| KEGG:04310 | Wnt signaling pathway                       | 0.050156699  |
| KEGG:04350 | TGF-beta signaling pathway                  | 0.034403422  |

**A** bioRxiv preprint doi: <https://doi.org/10.1101/271106>; this version posted February 26, 2018. The copyright holder for this preprint (which was not certified by peer review) is the author/funder, who has granted bioRxiv a license to display the preprint in perpetuity. It is made available under aCC-BY 4.0 International license.

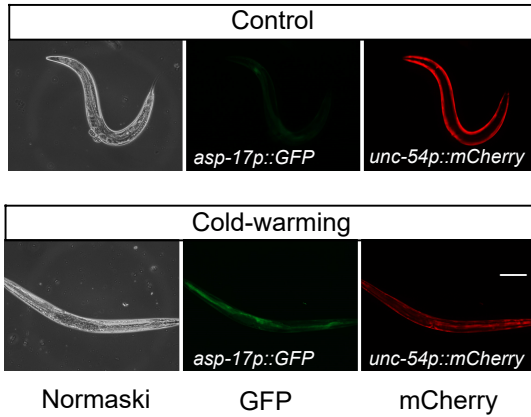

| Genotype                          | Chr. | <i>asp-17::GFP</i> | Mutation       | HomoloGene  |
|-----------------------------------|------|--------------------|----------------|-------------|
| Wild type                         |      | +                  |                |             |
| <i>dma37, dma38, dma70, dma72</i> | I    | ++++               |                |             |
| <i>dma60, dma62</i>               | IV   | +++                |                |             |
| <i>dma50</i>                      | V    | +++++              | <i>F53B7.3</i> | <i>ISY1</i> |
| <i>dma65, dma68, dma69, dma66</i> | V    | +++++              |                |             |
| <i>dma76</i>                      | X    | +++                |                |             |

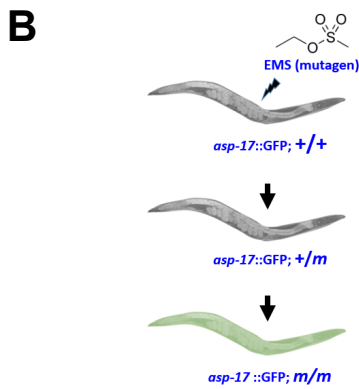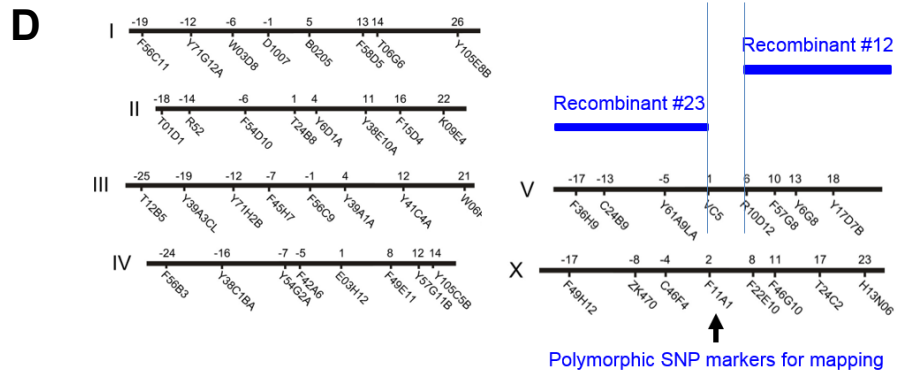

| ID     | Chr | Position | Type     | Mutation           | Gene        |
|--------|-----|----------|----------|--------------------|-------------|
| 137831 | V   | 5755472  | missense | CAT->CCT[His->Pro] | {K09H11.11} |
| 137833 | V   | 5755482  | missense | CAG->AAG[Gln->Lys] | {K09H11.11} |
| 137834 | V   | 5755509  | missense | CAG->AAG[Gln->Lys] | {K09H11.11} |
| 137835 | V   | 5755526  | missense | AAA->ACA[Lys->Thr] | {K09H11.11} |
| 137836 | V   | 5755527  | missense | AAA->CAA[Lys->Gln] | {K09H11.11} |
| 138694 | V   | 6176589  | missense | GTC->TTC[Val->Phe] | {W06H8.8}   |
| 138696 | V   | 6177078  | missense | CCA->GCA[Pro->Ala] | {W06H8.8}   |
| 138723 | V   | 6182672  | missense | CAA->CCA[Gln->Pro] | {W06H8.8}   |
| 144570 | V   | 9229947  | missense | GAT->GAG[Asp->Glu] | {F07C3.3}   |
| 144573 | V   | 9229951  | missense | ATT->AGT[Ile->Ser] | {F07C3.3}   |
| 145051 | V   | 9472465  | missense | AGT->AGA[Ser->Arg] | {F07D3.2}   |
| 145605 | V   | 9775413  | missense | GGT->GAT[Gly->Asp] | {F46B6.12}  |
| 147935 | V   | 10999964 | missense | GAA->AAA[Glu->Lys] | {F53B7.3}   |
| 149300 | V   | 11729925 | missense | ATG->TTG[Met->Leu] | {B0240.1}   |
| 150620 | V   | 12432165 | missense | TTC->ATC[Phe->Ile] | {C54D10.13} |
| 150754 | V   | 12491030 | missense | GTT->TTT[Val->Phe] | {W04D2.3}   |
| 153483 | V   | 13948723 | missense | TAT->GAT[Tyr->Asp] | {R10D12.5}  |
| 154125 | V   | 14265193 | missense | CCT->TCT[Pro->Ser] | {F40G12.3}  |
| 154807 | V   | 14585363 | missense | CAA->CTA[Gln->Leu] | {Y40H4A.2}  |
| 154808 | V   | 14585364 | missense | CAA->GAA[Gln->Glu] | {Y40H4A.2}  |
| 156519 | V   | 15432409 | missense | GAG->GAT[Glu->Asp] | {T26H5.8}   |
| 164074 | V   | 19037276 | missense | CTC->CAC[Leu->His] | {Y39B6A.24} |
| 164075 | V   | 19037278 | missense | CAT->CAG[His->Gln] | {Y39B6A.24} |
| 164076 | V   | 19037279 | missense | CAT->CTT[His->Leu] | {Y39B6A.24} |
| 164077 | V   | 19037280 | missense | CAT->TAT[His->Tyr] | {Y39B6A.24} |

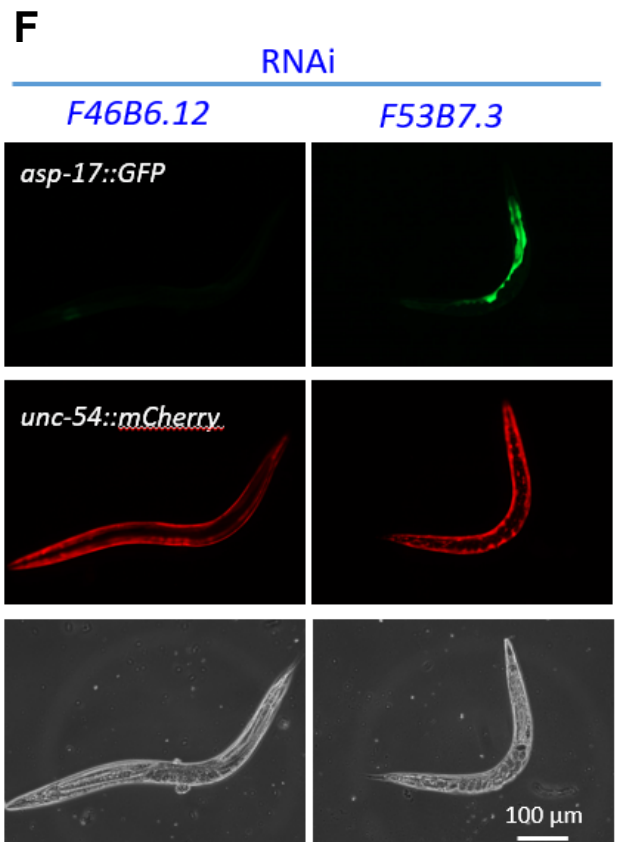

bioRxiv preprint doi: <https://doi.org/10.1101/271106>; this version posted February 26, 2018. The copyright holder for this preprint (which was not certified by peer review) is the author/funder, who has granted bioRxiv a license to display the preprint in perpetuity. It is made available under aCC-BY 4.0 International license.

**A**

*Saccharomyces cerevisiae* MSRNVDKANSVLRVFEQQAESAGGYKDYSRYRPRNVSQKYSIKENAWKRVQVSKETIKQKSTRIDYDPSLNEMQIAELNDELNNL 85  
*Arabidopsis thaliana* MARNAEKAMTALARWRMRKMEEEERGP I A ---RRPHDVKDCORNLSDAERFRREIVRDASKKIITAIQNPGLGEFKLRDLNDEVNRL 81  
*Caenorhabditis elegans* MARNEEKAQSMNRFITQKESKKKPKKE---RRPYLASECRDLAEDKWRQQILREITGSKVAEQNEGLGEHRLRDLNDEINKL 81  
*Drosophila melanogaster* MARNAEKAMTTLARWRAAKE-VEEGEKE---RRPYLASECHDLPRCEKFRLEIIRDISKKVAQIQNAGLGEFRIRDLNDEINKL 80  
*Danio rerio* MARNAEKAMTALARFRQAQL-EEGKVKKE---RRPYLASECNELPKAEKWRQQIIESEISKKVAQIQNAGLGEFKIRDLNDEINKL 80  
*Xenopus tropicalis* MARNAEKAMTALARFRQAQL-EEGKVKKE---RRPYLASECNELPKAEKWRQQIIGEISKKVAQIQNAGLGEFRIRDLNDEINKL 80  
*Homo sapiens* MARNAEKAMTALARFRQAQL-EEGKVKKE---RRPYLASECTELPKAEKWRQQIIGEISKKVAQIQNAGLGEFRIRDLNDEINKL 80  
*Mus musculus* MARNAEKAMTALARFRQAQL-EEGKVKKE---RRPYLASECTELPKAEKWRQQIIGEISKKVAQIQNAGLGEFRIRDLNDEINKL 80

*Saccharomyces cerevisiae* FKEWKRQWHIDHTLMEKKTKRKRLEDShVLmNSGK-----LINGKRYFGRALPEVREWLKQSQRQNDGGSINTKCIPIK 161  
*Arabidopsis thaliana* IKLKHAWEQRIRELGGTDYR---KYAQKELDAIGRETG-----NSRGYKYGAAKDLPGVRELFEKSTEGEEQRHRAD-LLR 165  
*Caenorhabditis elegans* LRERYHWERRIVELGGHNYS---KHSAKMTDLEGNIIDVPNPSGRGPGYRYFGAAKCLPGVRELFKPEL-RKRKTRID-IYK 160  
*Drosophila melanogaster* LREKRHWENQISSLGGPHYR---RYGPKMFDAGREVP-----GNRGYKYGAAKDLPGVRELFQDPPP-PPRKSRAE-LMK 163  
*Danio rerio* LREKGHWEVRIKELGGPDYR---RFGPKMLDHEGKEVP-----GNRGYKYGAAKDLPGVRELFSEVP-PPRKTRAE-LMK 163  
*Xenopus tropicalis* IREKGHWEVRIKELGGPDYR---RIGPKMLDHEGKEVP-----GNRGYKYGAAKDLPGVRELFKEPL-PPRKTRAE-LMK 163  
*Homo sapiens* LREKGHWEVRIKELGGPDYR---KVGPKMLDHEGKEVP-----GNRGYKYGAAKDLPGVRELFKEPL-PPRKTRAE-LMK 163  
*Mus musculus* LREKGHWEVRIKELGGPDYR---KVGPKMLDHEGKEVP-----GNRGYKYGAAKDLPGVRELFKEPL-PPRKTRAE-LMK 163

*Saccharomyces cerevisiae* DRNDFY--YHGKVTAAALTE-----FEANWTSILKA-----HYNVPVNE----- 197  
*Arabidopsis thaliana* NIDAHYFGYLDDEDGRLIPLLEKLIIEKNIERINKEFAEKQAQKQQT A ---SD--AAPENIYKVE-----EDDDDDLETQEST 227  
*Caenorhabditis elegans* RIDASYGYRDEDDGILEKLERKSEGGMRKRSVEEWRRLDEVKREARKGASE--VVSVGAATAAAAEVLFEEEEEDVVEEERMER 242  
*Drosophila melanogaster* DIDAEYGYRDEDDGVLIPLEERI ERAAIQKAVQEWREKM---ARDGRIIDDEEEDYIPLSGPARE-----AIEDAKARAAVE 229  
*Danio rerio* DIDADYGYRDEDDGVLPLLEQYEQKVMAEAVEKWKADKEARLAVGGAVKDT EEEEE-YIYAVRDEE-----RSDDET---GDQ 229  
*Xenopus tropicalis* SIDAEYGYRDEDDGVLVPLEQEEKKAIGEAELEKWRQEKARLANGDRNE--EEEEVNIYAVAA--D-----ESGDDS---DSG 226  
*Homo sapiens* AIDFEYGYLDDEDGVIPLLEQYEQKLRALVEKWKAEARLARGEKEEEEEEEEEINIYAVTE-E-----ESDEEG---SQE 229  
*Mus musculus* AIDFEYGYLDDEDGVIPLLEQYEQKLRALVEKWKAEARLARGEKEEEEEEEEEINIYAVTE-E-----ESDEEG---NQE 229

*Saccharomyces cerevisiae* --DEEEMSRQTQEI R VPTLADMEHWLVQRK KKLMDLNL----- 235  
*Arabidopsis thaliana* VIGEDGRPMTIRHVLLPTQQDIEEMLEEQKQELMAKYLD----- 267  
*Caenorhabditis elegans* EKEEEKEREFVVHVPLPDEKEIEKMYLEKKKMDL LSKYASEDLVEQQTEAKSMLNIHR----- 300  
*Drosophila melanogaster* DPHGLLASKFTAHVPVPTQQDVQEALLRQRKRELEKYAGT N----- 272  
*Danio rerio* MEGEDGQSFISHVVPVPSQKEIEEALVRRKMEMLLQKYASESLMAQSQAQKALLGL----- 285  
*Xenopus tropicalis* AEGEEGQQKFIAHVPVPTQKEIEEALVRRKMEMLLQKYASETLLAQSEDAKRLGLI----- 282  
*Homo sapiens* KGGDDSSQKFI AHVPVPSQKEIEEALVRRKMEMLLQKYASETLLAQSEEARLLGCRSGTRPARSGSAPSPRATTAVPMGPSLPT 314  
*Mus musculus* KAGEDGQQKFI AHVPVPSQKEIEEALVRRKMEMLLQKYASETLLAQSEEAQRLLGLY----- 285

**B**

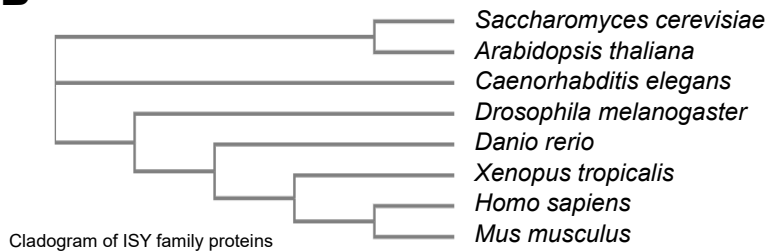

**C**

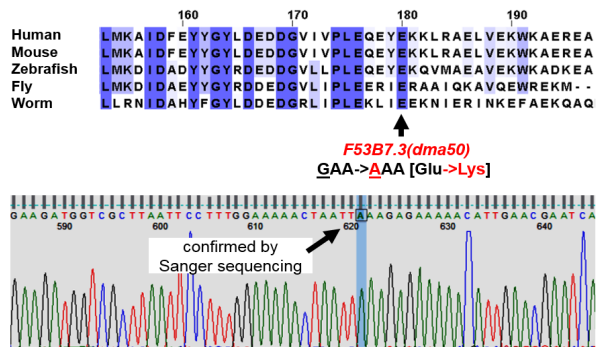

**D**

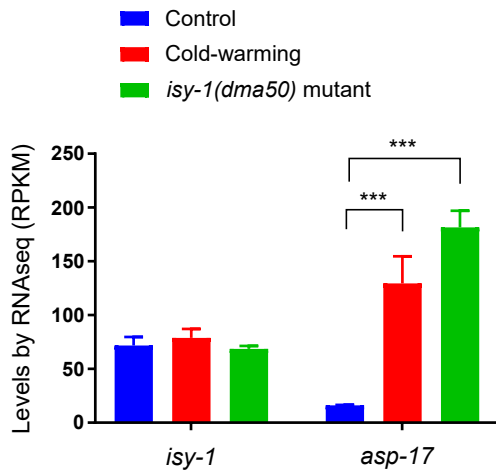

**E**

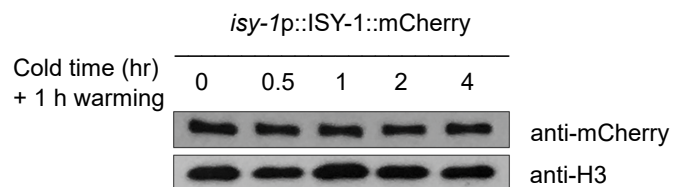

bioRxiv preprint doi: <https://doi.org/10.1101/271106>; this version posted February 26, 2018. The copyright holder for this preprint (which was not certified by peer review) is the author/funder, who has granted bioRxiv a license to display the preprint in perpetuity. It is made available under aCC-BY 4.0 International license.

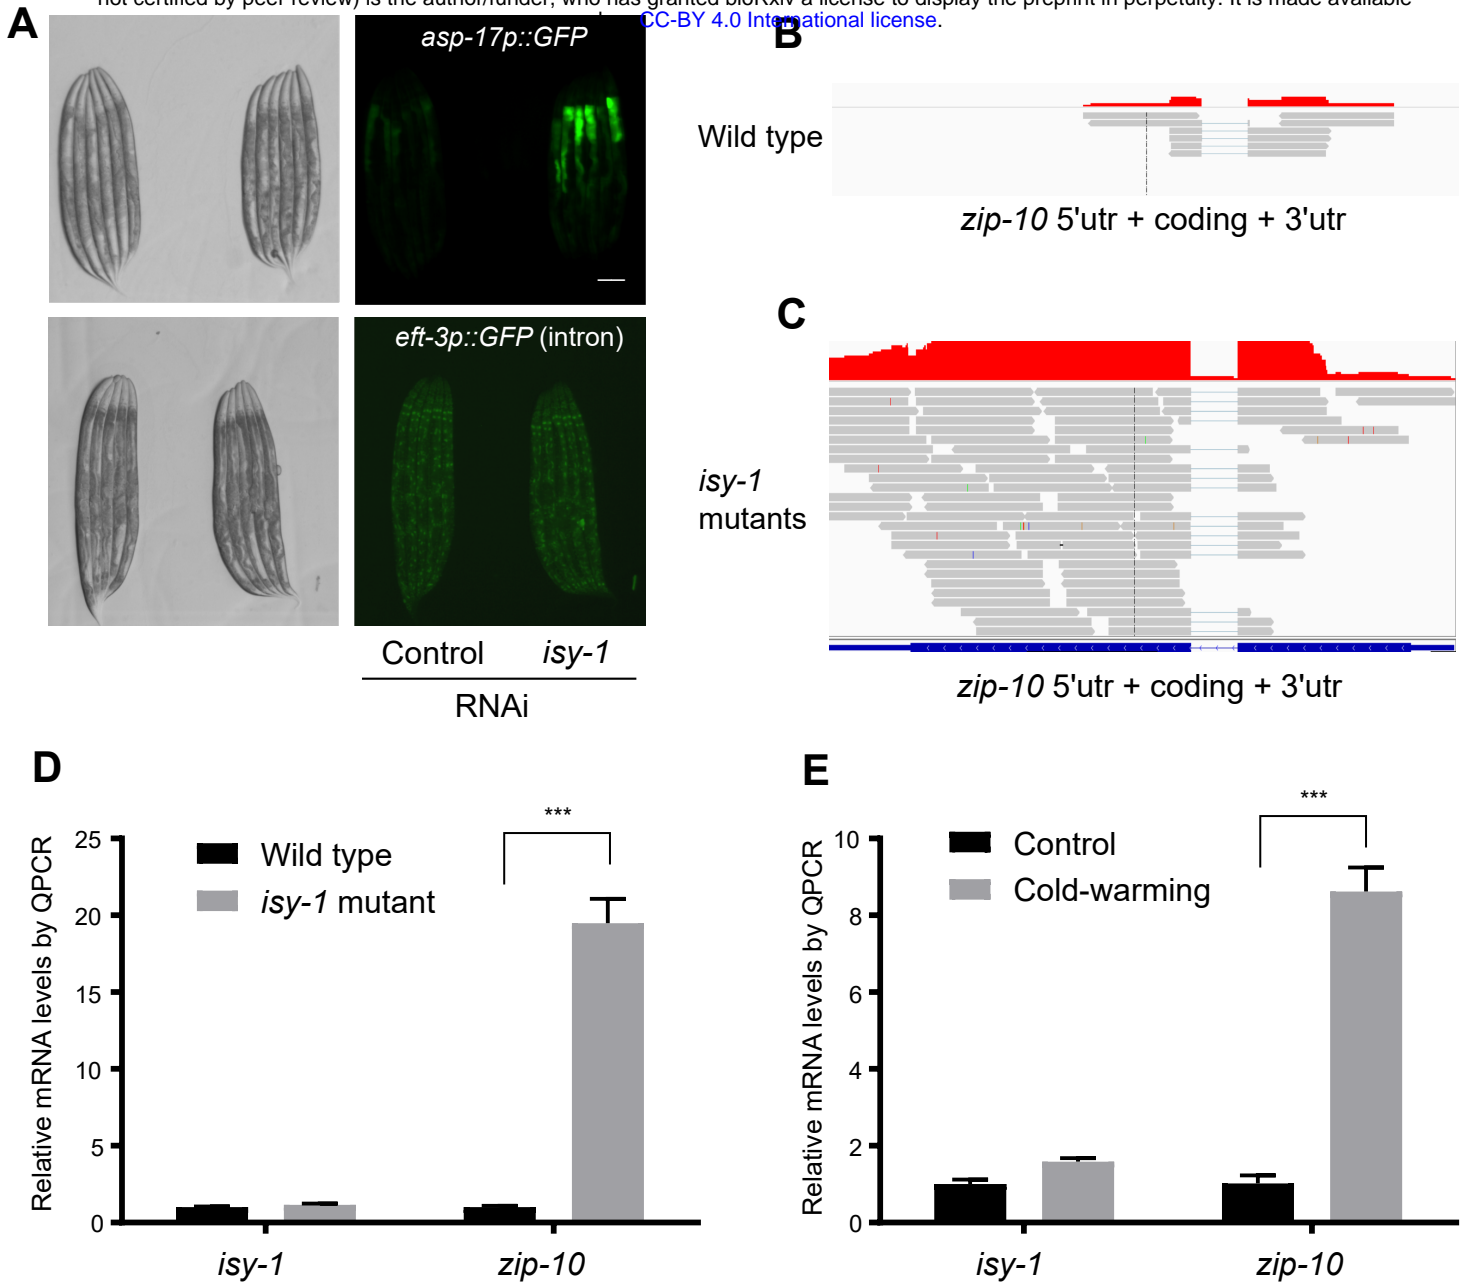

## Figure 3-figure supplement 2

bioRxiv preprint doi: <https://doi.org/10.1101/271106>; this version posted February 26, 2018. The copyright holder for this preprint (which was not certified by peer review) is the author/funder, who has granted bioRxiv a license to display the preprint in perpetuity. It is made available under aCC-BY 4.0 International license.

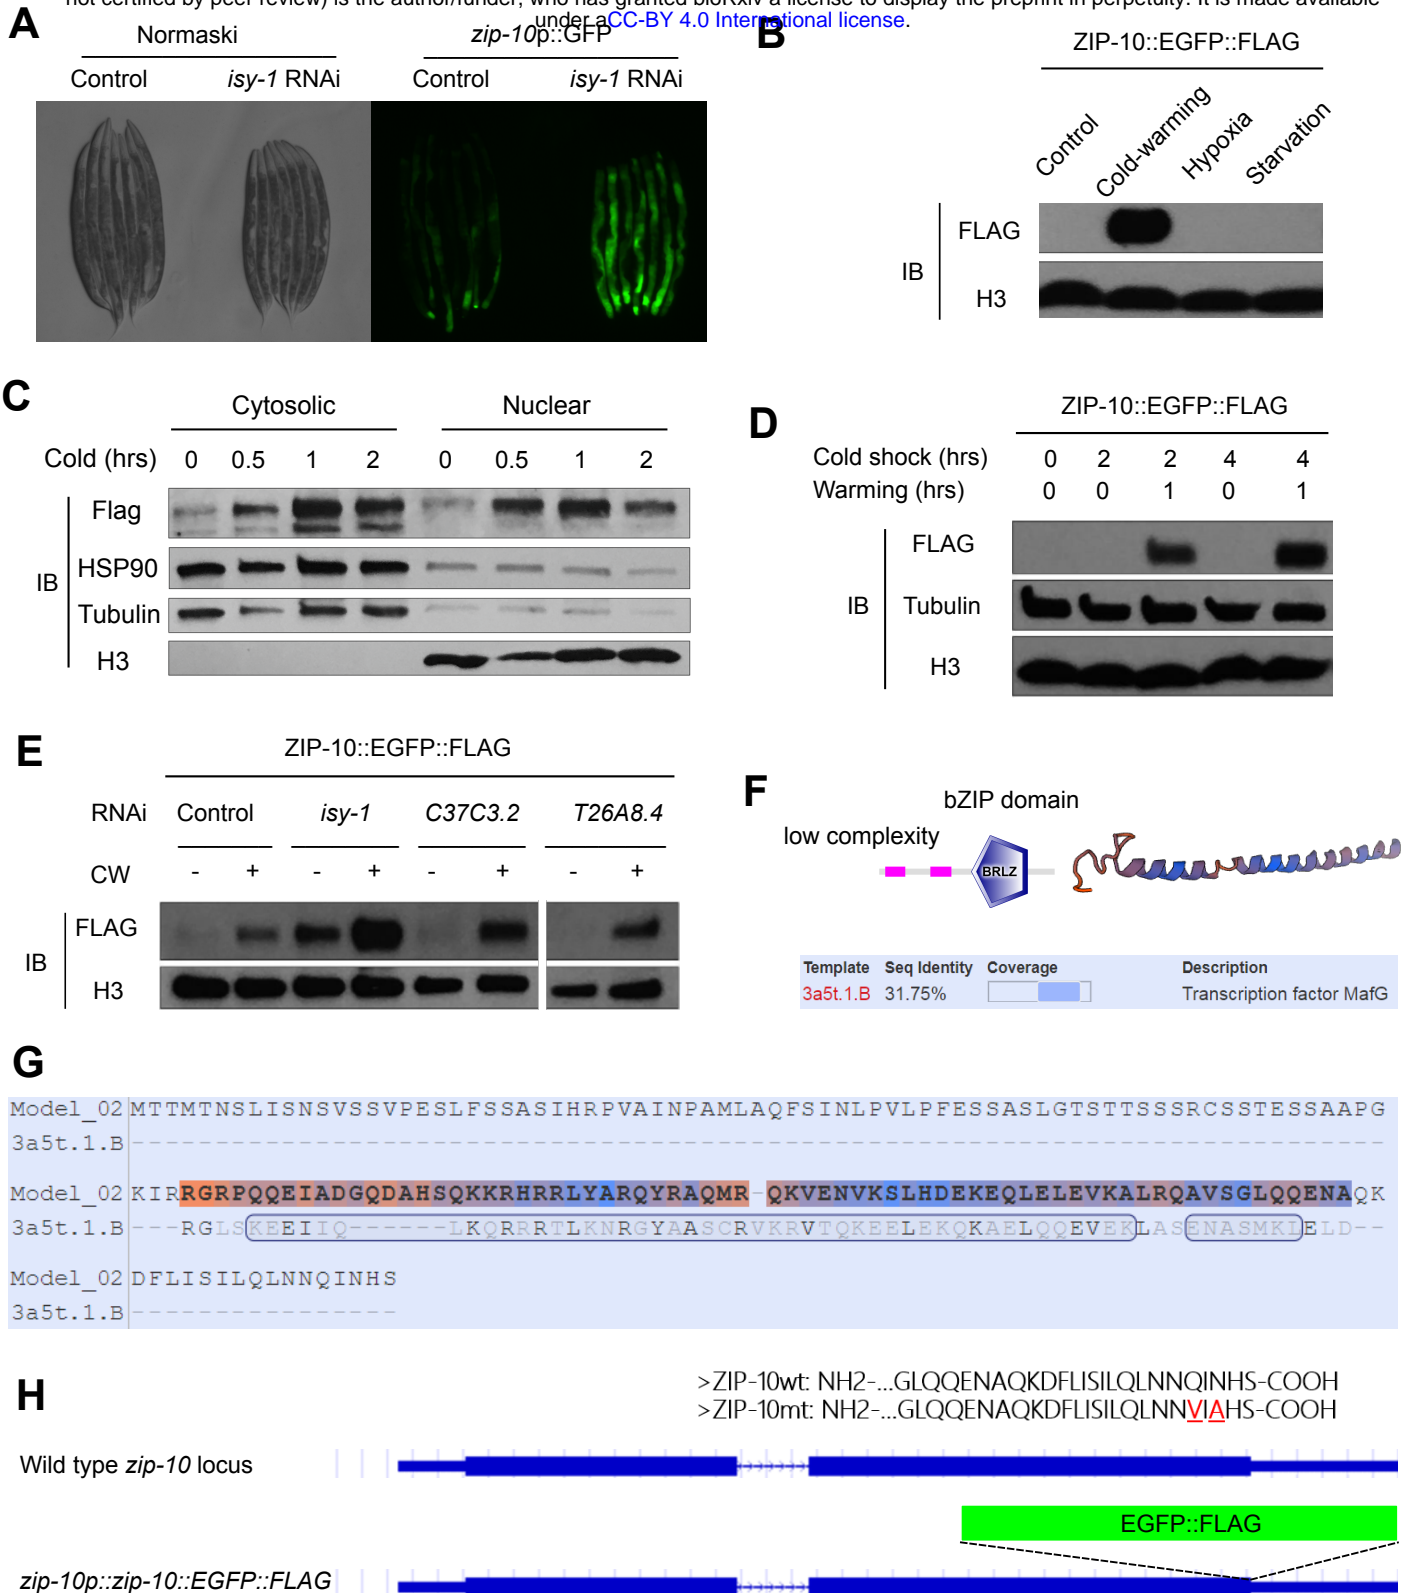

**Figure 4-Figure Supplement 1:** Relative mRNA levels of CW-inducible genes in wild-type and *zip-10* mutants.

| Gene           |                 | 1         | 2           | 3            | 4            | P value |
|----------------|-----------------|-----------|-------------|--------------|--------------|---------|
| <i>asp-17</i>  | WT              | 1.20±0.22 | 9.20±0.07   | 20.38±12.77  | 45.45±12.47  |         |
|                | <i>zip-10</i> m | 0.37±0.04 | 0.46±0.12   | 0.71±0.29    | 0.43±0.10    | 0.025   |
| <i>cpr-3</i>   | WT              | 1.01±0.18 | 2.80±0.16   | 3.67±0.10    | 9.75±1.43    |         |
|                | <i>zip-10</i> m | 1.24±0.05 | 1.31±0.48   | 1.99±0.40    | 1.30±0.52    | 0.005   |
| <i>ZK896.4</i> | WT              | 1.01±0.20 | 3.56±1.27   | 6.31±1.13    | 12.22±2.00   |         |
|                | <i>zip-10</i> m | 1.19±0.07 | 0.76±0.07   | 1.14±0.07    | 1.03±0.21    | 0.009   |
| <i>F53A9.1</i> | WT              | 0.80±0.29 | 1.27±0.48   | 2.78±1.07    | 5.51±2.29    |         |
|                | <i>zip-10</i> m | 0.69±0.19 | 1.50±0.42   | 2.60±0.62    | 4.95±1.56    | 0.748   |
| <i>srr-6</i>   | WT              | 1.09±0.29 | 4.68±2.84   | 18.31±15.68  | 55.37±33.32  |         |
|                | <i>zip-10</i> m | 1.74±0.53 | 37.31±22.32 | 136.49±46.46 | 188.14±64.10 | 0.050   |
| <i>ceh-37</i>  | WT              | 1.04±0.35 | 1.75±0.15   | 2.36±0.56    | 5.52±1.12    |         |
|                | <i>zip-10</i> m | 0.76±0.40 | 1.76±0.65   | 2.58±0.57    | 3.53±0.59    | 0.072   |
| <i>fis-2</i>   | WT              | 1.09±0.57 | 0.94±0.36   | 2.92±0.09    | 8.57±2.12    |         |
|                | <i>zip-10</i> m | 2.19±0.47 | 3.55±0.44   | 4.57±0.24    | 11.93±1.98   | 0.115   |
| <i>CYP14A5</i> | WT              | 0.98±0.14 | 2.53±0.46   | 7.54±2.90    | 26.04±5.55   |         |
|                | <i>zip-10</i> m | 3.99±1.29 | 6.77±0.77   | 10.12±0.78   | 28.57±5.66   | 0.610   |
| <i>sqst-1</i>  | WT              | 0.98±0.29 | 2.59±1.15   | 4.95±1.08    | 13.59±4.28   |         |
|                | <i>zip-10</i> m | 2.68±0.54 | 5.81±0.25   | 8.13±0.59    | 12.85±2.95   | 0.820   |
| <i>best-5</i>  | WT              | 0.97±0.31 | 1.79±0.40   | 5.34±3.24    | 18.21±6.83   |         |
|                | <i>zip-10</i> m | 1.37±0.97 | 2.94±0.26   | 6.06±2.23    | 13.35±4.41   | 0.368   |
| <i>tsp-1</i>   | WT              | 1.05±0.41 | 6.78±2.86   | 18.03±6.33   | 72.47±13.72  |         |
|                | <i>zip-10</i> m | 3.04±2.34 | 12.53±4.52  | 23.45±2.73   | 50.02±9.17   | 0.108   |
| <i>dod-3</i>   | WT              | 1.08±0.54 | 9.42±4.50   | 18.04±2.08   | 33.69±6.53   |         |
|                | <i>zip-10</i> m | 2.64±1.17 | 8.11±2.47   | 13.19±3.75   | 28.77±6.74   | 0.415   |
| <i>oac-20</i>  | WT              | 1.00±0.09 | 4.19±0.56   | 7.92±0.49    | 19.54±3.53   |         |
|                | <i>zip-10</i> m | 1.38±0.08 | 2.90±1.17   | 5.05±1.01    | 16.20±4.87   | 0.396   |
| <i>F37C4.5</i> | WT              | 1.01±0.17 | 2.10±0.38   | 2.79±1.84    | 8.94±2.34    |         |
|                | <i>zip-10</i> m | 1.43±0.18 | 1.49±0.27   | 2.19±0.33    | 5.28±1.69    | 0.100   |
| <i>dod-19</i>  | WT              | 1.08±0.45 | 0.95±0.01   | 0.67±0.02    | 1.41±0.37    |         |
|                | <i>zip-10</i> m | 1.33±0.07 | 0.85±0.09   | 0.97±0.18    | 1.75±0.23    | 0.262   |
| <i>dod-22</i>  | WT              | 1.15±0.74 | 1.52±0.1    | 1.27±0.22    | 2.76±0.50    |         |
|                | <i>zip-10</i> m | 1.41±0.25 | 1.29±0.34   | 2.55±0.24    | 3.41±0.59    | 0.226   |



|                |                 |           |           |            |            |       |
|----------------|-----------------|-----------|-----------|------------|------------|-------|
| <i>oac-6</i>   | WT              | 1.01±0.12 | 3.07±0.77 | 5.36±1.28  | 10.94±3.72 |       |
|                | <i>zip-10</i> m | 1.79±0.25 | 2.34±1.30 | 4.80±0.98  | 8.22±1.61  | 0.336 |
| <i>K09D9.1</i> | WT              | 1.05±0.38 | 1.05±0.58 | 4.01±2.82  | 24.56±3.64 |       |
|                | <i>zip-10</i> m | 3.31±1.14 | 7.38±1.61 | 11.55±3.07 | 27.66±8.46 | 0.605 |
| <i>clec-41</i> | WT              | 1.08±0.49 | 0.83±0.38 | 1.37±0.17  | 2.31±0.54  |       |
|                | <i>zip-10</i> m | 1.63±0.27 | 0.35±0.21 | 0.68±0.26  | 1.26±0.19  | 0.065 |
| <i>F48E3.8</i> | WT              | 1.17±0.72 | 0.87±0.42 | 2.07±0.97  | 5.30±1.14  |       |
|                | <i>zip-10</i> m | 0.99±0.27 | 0.60±0.49 | 1.22±0.08  | 5.66±0.66  | 0.666 |
| <i>cebp-1</i>  | WT              | 1.04±0.34 | 1.44±0.22 | 2.84±0.34  | 6.80±3.05  |       |
|                | <i>zip-10</i> m | 2.21±0.69 | 2.07±0.37 | 3.01±0.14  | 4.58±0.90  | 0.335 |

WT: wild type;

*zip-10* m: *zip-10* mutant (*ok3462*);

1. 25°C;

2. 4°C-1h, 25°C-1h;

3. 4°C-2h, 25°C-1h;

4. 4°C-4h, 25°C-1h.

n=3 biological replicates.



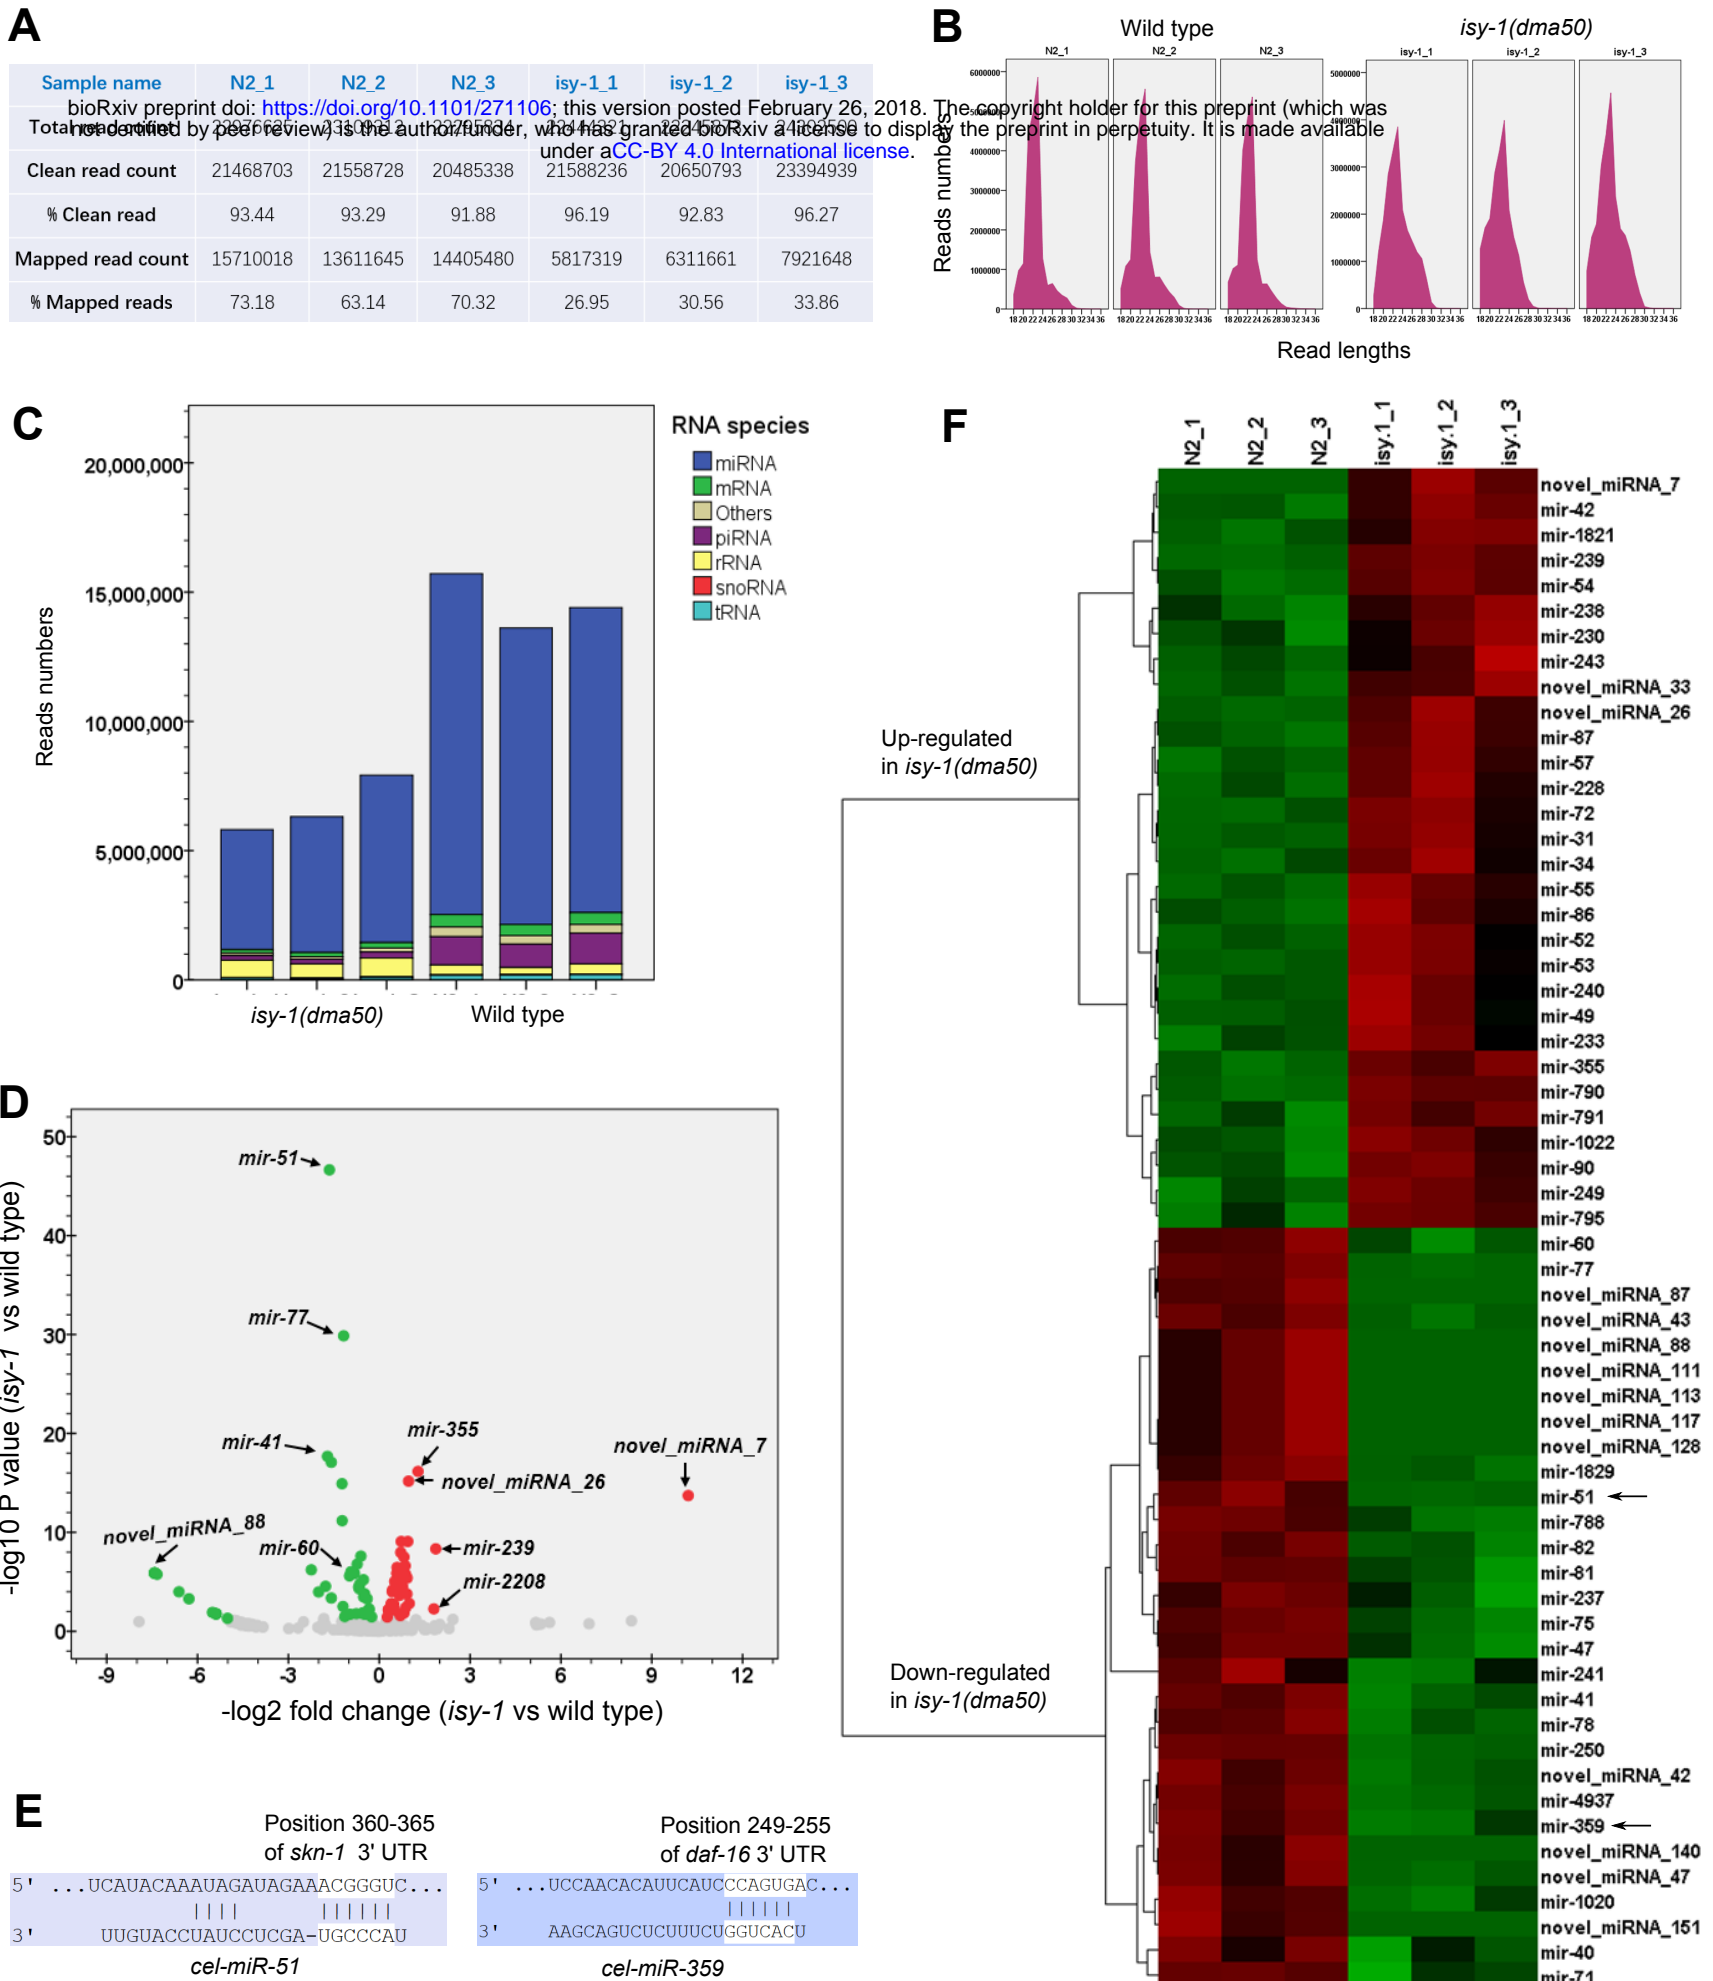

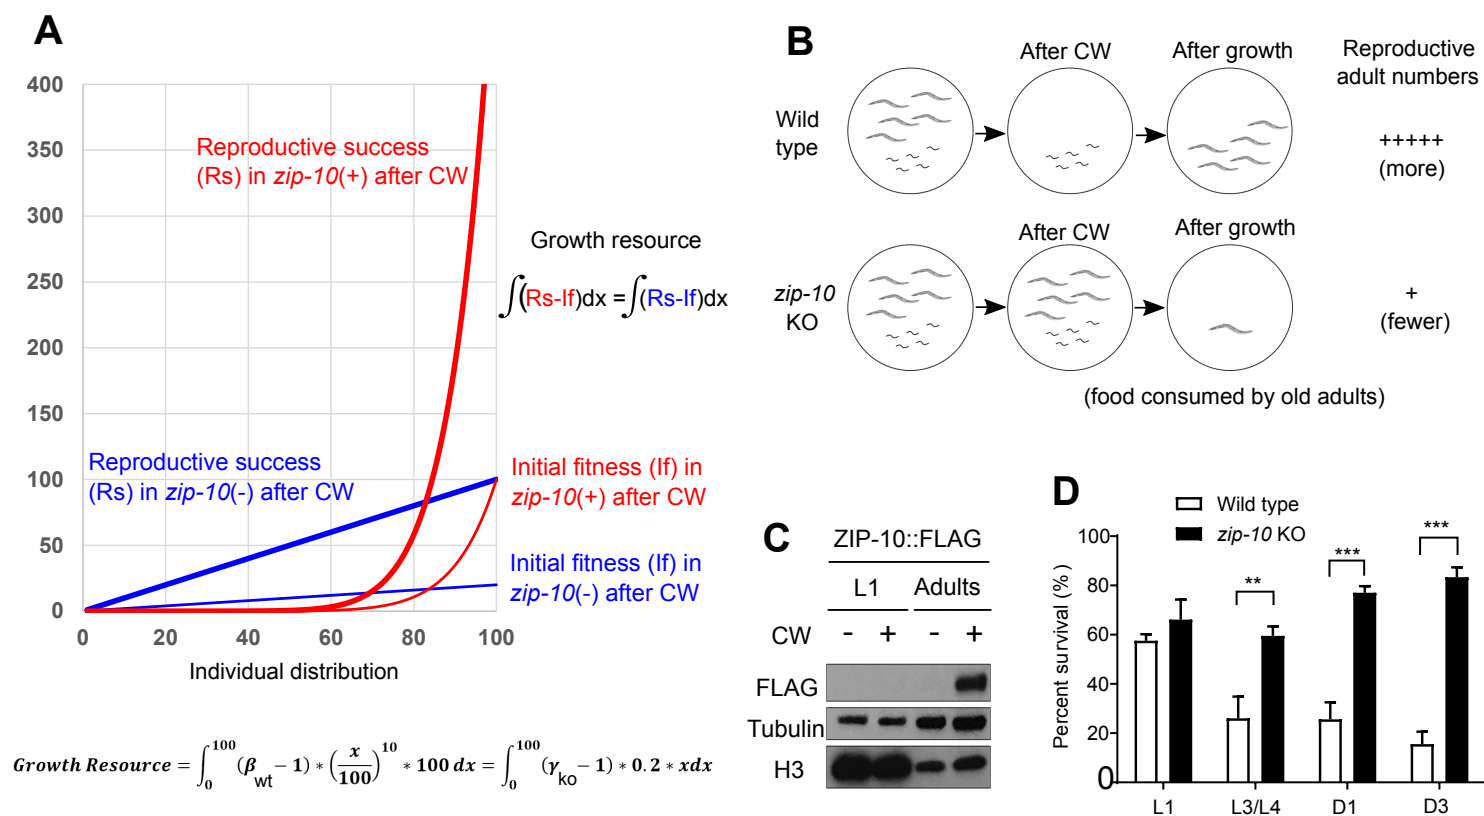

Source: https://www.biorxiv.org/content/10.1101/271106v2.full.pdf
